# Supplementary material for: Genetic differentiation, local adaptation and phenotypic plasticity in fragmented populations of a rare forest herb
Source: PeerJ. 2018 Jun 13;6:e4929. doi: 10.7717/peerj.4929 (PMC6004105; doi:10.7717/peerj.4929)
Supplement: Data S1 [file peerj-06-4929-s005.xlsx]

## Sheet: Foglio1
X	N_leaves	Lat_spr	Pl_H	Flower	Simp_umb	Comp_umb	Infl_sz	SW	Seeds	POP_size	FLad	Non_FLad	Juv	Seedl	H_Nei	P%	Elev	Hab_sz	Slope	Hab_qu	Hab_fra	Wood	Alien	Metca	Mg	Ca	K	pH	N%	C%	C/N	P	Ace_cam	Ane_nem	Aru_dio	Asp_alb	Bet_pen	Bra_syl	Car_bul	Car_bri	Car_fla	Car_mon	Car_bet	Cas_sat	Cor_ave	Cra_mon	Con_maj	Dap_lau	Ery_den
GRAF	2	55	109	1	15	2	6	0.015	1	50	22	15	7	6	0.130187	61.99	130	4	30	1	2	2	1	1	8.7288	17.2834	5.42227	3.6	0.0898726	0.983501	11.0926	0.00945328	5	0	0	0	0	10	5	0	0	0	0	50	5	5	10	0	0
GRAF	2	61.5	119.5	1	17	5	6.3	0.0231	1	50	22	15	7	6	0.130187	61.99	130	4	30	1	2	2	1	1	8.7288	17.2834	5.42227	3.6	0.0898726	0.983501	11.0926	0.00945328	5	0	0	0	0	10	5	0	0	0	0	50	5	5	10	0	0
GRAF	2	63	95.5	1	14	5	10.1	0.0417	1	50	22	15	7	6	0.130187	61.99	130	4	30	1	2	2	1	1	8.7288	17.2834	5.42227	3.6	0.0898726	0.983501	11.0926	0.00945328	5	0	0	0	0	10	5	0	0	0	0	50	5	5	10	0	0
GRAF	2	32	105	1	13	3	10.5	0.0368	1	50	22	15	7	6	0.130187	61.99	130	4	30	1	2	2	1	1	8.7288	17.2834	5.42227	3.6	0.0898726	0.983501	11.0926	0.00945328	5	0	0	0	0	10	5	0	0	0	0	50	5	5	10	0	0
GRAF	1	38	49	1	14	2	3.5	0.0005	1	50	22	15	7	6	0.130187	61.99	130	4	30	1	2	2	1	1	8.7288	17.2834	5.42227	3.6	0.0898726	0.983501	11.0926	0.00945328	5	0	0	0	0	10	5	0	0	0	0	50	5	5	10	0	0
GRAF	3	50.5	53	1	15	2	4	0.0046	1	50	22	15	7	6	0.130187	61.99	130	4	30	1	2	2	1	1	8.7288	17.2834	5.42227	3.6	0.0898726	0.983501	11.0926	0.00945328	5	0	0	0	0	10	5	0	0	0	0	50	5	5	10	0	0
GRAF	3	51	62	1	15	2	6	0.0012	1	50	22	15	7	6	0.130187	61.99	130	4	30	1	2	2	1	1	8.7288	17.2834	5.42227	3.6	0.0898726	0.983501	11.0926	0.00945328	5	0	0	0	0	10	5	0	0	0	0	50	5	5	10	0	0
GRAF	2	30	99.5	1	13	3	10.5	0.003	1	50	22	15	7	6	0.130187	61.99	130	4	30	1	2	2	1	1	8.7288	17.2834	5.42227	3.6	0.0898726	0.983501	11.0926	0.00945328	5	0	0	0	0	10	5	0	0	0	0	50	5	5	10	0	0
GRAF	1	38	47.5	1	16	1	5.5	md	0	50	22	15	7	6	0.130187	61.99	130	4	30	1	2	2	1	1	8.7288	17.2834	5.42227	3.6	0.0898726	0.983501	11.0926	0.00945328	5	0	0	0	0	10	5	0	0	0	0	50	5	5	10	0	0
GRAF	2	52	51	1	9	2	3.5	md	0	50	22	15	7	6	0.130187	61.99	130	4	30	1	2	2	1	1	8.7288	17.2834	5.42227	3.6	0.0898726	0.983501	11.0926	0.00945328	5	0	0	0	0	10	5	0	0	0	0	50	5	5	10	0	0
GRAF	4	44	64.5	1	16	2	8.5	md	0	50	22	15	7	6	0.130187	61.99	130	4	30	1	2	2	1	1	8.7288	17.2834	5.42227	3.6	0.0898726	0.983501	11.0926	0.00945328	5	0	0	0	0	10	5	0	0	0	0	50	5	5	10	0	0
GRAF	3	53.5	38	1	11	1	3	md	0	50	22	15	7	6	0.130187	61.99	130	4	30	1	2	2	1	1	8.7288	17.2834	5.42227	3.6	0.0898726	0.983501	11.0926	0.00945328	5	0	0	0	0	10	5	0	0	0	0	50	5	5	10	0	0
GRAF	2	50	89	1	15	4	6.5	md	0	50	22	15	7	6	0.130187	61.99	130	4	30	1	2	2	1	1	8.7288	17.2834	5.42227	3.6	0.0898726	0.983501	11.0926	0.00945328	5	0	0	0	0	10	5	0	0	0	0	50	5	5	10	0	0
GRAF	4	55	108	1	18	4	8.2	md	0	50	22	15	7	6	0.130187	61.99	130	4	30	1	2	2	1	1	8.7288	17.2834	5.42227	3.6	0.0898726	0.983501	11.0926	0.00945328	5	0	0	0	0	10	5	0	0	0	0	50	5	5	10	0	0
GRAF	4	50	md	0	md	md	md	md	md	50	22	15	7	6	0.130187	61.99	130	4	30	1	2	2	1	1	8.7288	17.2834	5.42227	3.6	0.0898726	0.983501	11.0926	0.00945328	5	0	0	0	0	10	5	0	0	0	0	50	5	5	10	0	0
GRAF	2	45	md	0	md	md	md	md	md	50	22	15	7	6	0.130187	61.99	130	4	30	1	2	2	1	1	8.7288	17.2834	5.42227	3.6	0.0898726	0.983501	11.0926	0.00945328	5	0	0	0	0	10	5	0	0	0	0	50	5	5	10	0	0
GRAF	2	43.5	md	0	md	md	md	md	md	50	22	15	7	6	0.130187	61.99	130	4	30	1	2	2	1	1	8.7288	17.2834	5.42227	3.6	0.0898726	0.983501	11.0926	0.00945328	5	0	0	0	0	10	5	0	0	0	0	50	5	5	10	0	0
GRAF	2	48	md	0	md	md	md	md	md	50	22	15	7	6	0.130187	61.99	130	4	30	1	2	2	1	1	8.7288	17.2834	5.42227	3.6	0.0898726	0.983501	11.0926	0.00945328	5	0	0	0	0	10	5	0	0	0	0	50	5	5	10	0	0
SC	2	73.5	109	1	20	4	8.1	md	0	16	3	10	1	2	0.086516	28.07	160	1	15	1	3	2	1	1	7.01	23.8592	6.07594	3.512	0.159878	2.28868	14.3672	0.120113	0	0	0	0	0	0	10	5	0	0	0	30	10	5	0	0	0
SC	4	47	71	1	15	1	5.5	md	0	16	3	10	1	2	0.086516	28.07	160	1	15	1	3	2	1	1	7.01	23.8592	6.07594	3.512	0.159878	2.28868	14.3672	0.120113	0	0	0	0	0	0	10	5	0	0	0	30	10	5	0	0	0
SC	1	34	98	1	17	2	5	md	0	16	3	10	1	2	0.086516	28.07	160	1	15	1	3	2	1	1	7.01	23.8592	6.07594	3.512	0.159878	2.28868	14.3672	0.120113	0	0	0	0	0	0	10	5	0	0	0	30	10	5	0	0	0
SC	2	68	md	0	md	md	md	md	md	16	3	10	1	2	0.086516	28.07	160	1	15	1	3	2	1	1	7.01	23.8592	6.07594	3.512	0.159878	2.28868	14.3672	0.120113	0	0	0	0	0	0	10	5	0	0	0	30	10	5	0	0	0
SC	3	40	md	0	md	md	md	md	md	16	3	10	1	2	0.086516	28.07	160	1	15	1	3	2	1	1	7.01	23.8592	6.07594	3.512	0.159878	2.28868	14.3672	0.120113	0	0	0	0	0	0	10	5	0	0	0	30	10	5	0	0	0
SC	5	34.5	md	0	md	md	md	md	md	16	3	10	1	2	0.086516	28.07	160	1	15	1	3	2	1	1	7.01	23.8592	6.07594	3.512	0.159878	2.28868	14.3672	0.120113	0	0	0	0	0	0	10	5	0	0	0	30	10	5	0	0	0
SC	2	30	md	0	md	md	md	md	md	16	3	10	1	2	0.086516	28.07	160	1	15	1	3	2	1	1	7.01	23.8592	6.07594	3.512	0.159878	2.28868	14.3672	0.120113	0	0	0	0	0	0	10	5	0	0	0	30	10	5	0	0	0
SC	4	39	md	0	md	md	md	md	md	16	3	10	1	2	0.086516	28.07	160	1	15	1	3	2	1	1	7.01	23.8592	6.07594	3.512	0.159878	2.28868	14.3672	0.120113	0	0	0	0	0	0	10	5	0	0	0	30	10	5	0	0	0
SC	3	56	md	0	md	md	md	md	md	16	3	10	1	2	0.086516	28.07	160	1	15	1	3	2	1	1	7.01	23.8592	6.07594	3.512	0.159878	2.28868	14.3672	0.120113	0	0	0	0	0	0	10	5	0	0	0	30	10	5	0	0	0
SC	4	31	md	0	md	md	md	md	md	16	3	10	1	2	0.086516	28.07	160	1	15	1	3	2	1	1	7.01	23.8592	6.07594	3.512	0.159878	2.28868	14.3672	0.120113	0	0	0	0	0	0	10	5	0	0	0	30	10	5	0	0	0
SC	3	65	md	0	md	md	md	md	md	16	3	10	1	2	0.086516	28.07	160	1	15	1	3	2	1	1	7.01	23.8592	6.07594	3.512	0.159878	2.28868	14.3672	0.120113	0	0	0	0	0	0	10	5	0	0	0	30	10	5	0	0	0
RIV1	2	38	62.5	1	15	1	4.1	0.0133	1	32	13	6	7	6	0.11409	38.6	235	2	20	2	1	2	0	1	16.1532	84.6754	10.8861	4.178	0.155372	1.76997	12.0579	0.0883411	5	0	0	0	0	0	0	0	0	0	10	70	10	5	0	5	0
RIV1	3	42	108	1	16	6	7.4	0.0175	1	32	13	6	7	6	0.11409	38.6	235	2	20	2	1	2	0	1	16.1532	84.6754	10.8861	4.178	0.155372	1.76997	12.0579	0.0883411	5	0	0	0	0	0	0	0	0	0	10	70	10	5	0	5	0
RIV1	4	30	60.5	1	14	1	3.5	0.0462	1	32	13	6	7	6	0.11409	38.6	235	2	20	2	1	2	0	1	16.1532	84.6754	10.8861	4.178	0.155372	1.76997	12.0579	0.0883411	5	0	0	0	0	0	0	0	0	0	10	70	10	5	0	5	0
RIV1	2	29.5	96.5	1	19	6	9.4	0.0057	1	32	13	6	7	6	0.11409	38.6	235	2	20	2	1	2	0	1	16.1532	84.6754	10.8861	4.178	0.155372	1.76997	12.0579	0.0883411	5	0	0	0	0	0	0	0	0	0	10	70	10	5	0	5	0
RIV1	2	31	94	1	18	5	8.1	0.0203	1	32	13	6	7	6	0.11409	38.6	235	2	20	2	1	2	0	1	16.1532	84.6754	10.8861	4.178	0.155372	1.76997	12.0579	0.0883411	5	0	0	0	0	0	0	0	0	0	10	70	10	5	0	5	0
RIV1	2	48	85.5	1	18	4	7.8	0.0183	1	32	13	6	7	6	0.11409	38.6	235	2	20	2	1	2	0	1	16.1532	84.6754	10.8861	4.178	0.155372	1.76997	12.0579	0.0883411	5	0	0	0	0	0	0	0	0	0	10	70	10	5	0	5	0
RIV1	6	68	119	1	20	8	8.8	0.0138	1	32	13	6	7	6	0.11409	38.6	235	2	20	2	1	2	0	1	16.1532	84.6754	10.8861	4.178	0.155372	1.76997	12.0579	0.0883411	5	0	0	0	0	0	0	0	0	0	10	70	10	5	0	5	0
RIV1	4	71	134	1	16	7	9.5	0.0081	1	32	13	6	7	6	0.11409	38.6	235	2	20	2	1	2	0	1	16.1532	84.6754	10.8861	4.178	0.155372	1.76997	12.0579	0.0883411	5	0	0	0	0	0	0	0	0	0	10	70	10	5	0	5	0
RIV1	2	35	112	1	21	5	6	0.0127	1	32	13	6	7	6	0.11409	38.6	235	2	20	2	1	2	0	1	16.1532	84.6754	10.8861	4.178	0.155372	1.76997	12.0579	0.0883411	5	0	0	0	0	0	0	0	0	0	10	70	10	5	0	5	0
RIV1	3	63	67	1	14	3	4.4	0.0175	1	32	13	6	7	6	0.11409	38.6	235	2	20	2	1	2	0	1	16.1532	84.6754	10.8861	4.178	0.155372	1.76997	12.0579	0.0883411	5	0	0	0	0	0	0	0	0	0	10	70	10	5	0	5	0
RIV1	3	38.5	127	1	14	6	7	0.0059	1	32	13	6	7	6	0.11409	38.6	235	2	20	2	1	2	0	1	16.1532	84.6754	10.8861	4.178	0.155372	1.76997	12.0579	0.0883411	5	0	0	0	0	0	0	0	0	0	10	70	10	5	0	5	0
RIV1	5	65.5	135	1	17	6	8.3	md	0	32	13	6	7	6	0.11409	38.6	235	2	20	2	1	2	0	1	16.1532	84.6754	10.8861	4.178	0.155372	1.76997	12.0579	0.0883411	5	0	0	0	0	0	0	0	0	0	10	70	10	5	0	5	0
RIV1	2	35	89	1	16	4	6.5	md	0	32	13	6	7	6	0.11409	38.6	235	2	20	2	1	2	0	1	16.1532	84.6754	10.8861	4.178	0.155372	1.76997	12.0579	0.0883411	5	0	0	0	0	0	0	0	0	0	10	70	10	5	0	5	0
RIV1	4	62	md	0	md	md	md	md	md	32	13	6	7	6	0.11409	38.6	235	2	20	2	1	2	0	1	16.1532	84.6754	10.8861	4.178	0.155372	1.76997	12.0579	0.0883411	5	0	0	0	0	0	0	0	0	0	10	70	10	5	0	5	0
RIV1	3	49.5	md	0	md	md	md	md	md	32	13	6	7	6	0.11409	38.6	235	2	20	2	1	2	0	1	16.1532	84.6754	10.8861	4.178	0.155372	1.76997	12.0579	0.0883411	5	0	0	0	0	0	0	0	0	0	10	70	10	5	0	5	0
RIV1	3	47	md	0	md	md	md	md	md	32	13	6	7	6	0.11409	38.6	235	2	20	2	1	2	0	1	16.1532	84.6754	10.8861	4.178	0.155372	1.76997	12.0579	0.0883411	5	0	0	0	0	0	0	0	0	0	10	70	10	5	0	5	0
RIV1	6	60	md	0	md	md	md	md	md	32	13	6	7	6	0.11409	38.6	235	2	20	2	1	2	0	1	16.1532	84.6754	10.8861	4.178	0.155372	1.76997	12.0579	0.0883411	5	0	0	0	0	0	0	0	0	0	10	70	10	5	0	5	0
RIV1	2	57	md	0	md	md	md	md	md	32	13	6	7	6	0.11409	38.6	235	2	20	2	1	2	0	1	16.1532	84.6754	10.8861	4.178	0.155372	1.76997	12.0579	0.0883411	5	0	0	0	0	0	0	0	0	0	10	70	10	5	0	5	0
RIV1	3	42	md	0	md	md	md	md	md	32	13	6	7	6	0.11409	38.6	235	2	20	2	1	2	0	1	16.1532	84.6754	10.8861	4.178	0.155372	1.76997	12.0579	0.0883411	5	0	0	0	0	0	0	0	0	0	10	70	10	5	0	5	0
RIV2	2	72	117	1	12	3	9.8	0.0135	1	378	94	182	58	44	0.119287	44.44	370	4	25	3	1	1	0	0	30.1905	69.6354	10.3724	4.116	0.11252	1.86205	16.8578	0.0912234	0	0	0	0	0	50	0	0	5	0	0	5	5	0	0	0	0
RIV2	3	53	105.5	1	18	4	7.1	0.0323	1	378	94	182	58	44	0.119287	44.44	370	4	25	3	1	1	0	0	30.1905	69.6354	10.3724	4.116	0.11252	1.86205	16.8578	0.0912234	0	0	0	0	0	50	0	0	5	0	0	5	5	0	0	0	0
RIV2	3	28	66.5	1	15	4	8.2	0.0217	1	378	94	182	58	44	0.119287	44.44	370	4	25	3	1	1	0	0	30.1905	69.6354	10.3724	4.116	0.11252	1.86205	16.8578	0.0912234	0	0	0	0	0	50	0	0	5	0	0	5	5	0	0	0	0
RIV2	2	42	105	1	15	1	11	0.0223	1	378	94	182	58	44	0.119287	44.44	370	4	25	3	1	1	0	0	30.1905	69.6354	10.3724	4.116	0.11252	1.86205	16.8578	0.0912234	0	0	0	0	0	50	0	0	5	0	0	5	5	0	0	0	0
RIV2	1	27	74.5	1	14	5	9.4	0.0213	1	378	94	182	58	44	0.119287	44.44	370	4	25	3	1	1	0	0	30.1905	69.6354	10.3724	4.116	0.11252	1.86205	16.8578	0.0912234	0	0	0	0	0	50	0	0	5	0	0	5	5	0	0	0	0
RIV2	2	35	82	1	14	3	6.2	0.0099	1	378	94	182	58	44	0.119287	44.44	370	4	25	3	1	1	0	0	30.1905	69.6354	10.3724	4.116	0.11252	1.86205	16.8578	0.0912234	0	0	0	0	0	50	0	0	5	0	0	5	5	0	0	0	0
RIV2	2	36	65	1	15	2	5.4	0.0121	1	378	94	182	58	44	0.119287	44.44	370	4	25	3	1	1	0	0	30.1905	69.6354	10.3724	4.116	0.11252	1.86205	16.8578	0.0912234	0	0	0	0	0	50	0	0	5	0	0	5	5	0	0	0	0
RIV2	2	55	94	1	14	4	8.2	0.0318	1	378	94	182	58	44	0.119287	44.44	370	4	25	3	1	1	0	0	30.1905	69.6354	10.3724	4.116	0.11252	1.86205	16.8578	0.0912234	0	0	0	0	0	50	0	0	5	0	0	5	5	0	0	0	0
RIV2	2	43.5	70	1	15	4	9.8	0.0102	1	378	94	182	58	44	0.119287	44.44	370	4	25	3	1	1	0	0	30.1905	69.6354	10.3724	4.116	0.11252	1.86205	16.8578	0.0912234	0	0	0	0	0	50	0	0	5	0	0	5	5	0	0	0	0
RIV2	2	57	73.5	1	13	3	7.7	0.0156	1	378	94	182	58	44	0.119287	44.44	370	4	25	3	1	1	0	0	30.1905	69.6354	10.3724	4.116	0.11252	1.86205	16.8578	0.0912234	0	0	0	0	0	50	0	0	5	0	0	5	5	0	0	0	0
RIV2	1	21	56	1	16	3	6.2	0.0152	1	378	94	182	58	44	0.119287	44.44	370	4	25	3	1	1	0	0	30.1905	69.6354	10.3724	4.116	0.11252	1.86205	16.8578	0.0912234	0	0	0	0	0	50	0	0	5	0	0	5	5	0	0	0	0
RIV2	4	30.5	78	1	13	5	6	0.0094	1	378	94	182	58	44	0.119287	44.44	370	4	25	3	1	1	0	0	30.1905	69.6354	10.3724	4.116	0.11252	1.86205	16.8578	0.0912234	0	0	0	0	0	50	0	0	5	0	0	5	5	0	0	0	0
RIV2	2	38	71.5	1	16	1	8.4	0.0107	1	378	94	182	58	44	0.119287	44.44	370	4	25	3	1	1	0	0	30.1905	69.6354	10.3724	4.116	0.11252	1.86205	16.8578	0.0912234	0	0	0	0	0	50	0	0	5	0	0	5	5	0	0	0	0
RIV2	2	45	64	1	15	3	6.8	0.0213	1	378	94	182	58	44	0.119287	44.44	370	4	25	3	1	1	0	0	30.1905	69.6354	10.3724	4.116	0.11252	1.86205	16.8578	0.0912234	0	0	0	0	0	50	0	0	5	0	0	5	5	0	0	0	0
RIV2	2	40.5	114.5	1	18	5	8.6	0.0181	1	378	94	182	58	44	0.119287	44.44	370	4	25	3	1	1	0	0	30.1905	69.6354	10.3724	4.116	0.11252	1.86205	16.8578	0.0912234	0	0	0	0	0	50	0	0	5	0	0	5	5	0	0	0	0
FAGA	1	16	51	1	17	2	3.6	0.0032	1	236	90	73	45	28	0.0991625	32.75	126	3	0	3	1	1	1	1	4.3217	18.3265	7.10574	3.678	0.340863	4.88501	14.1646	0.389599	5	0	0	5	0	0	0	5	0	0	30	0	0	0	50	0	0
FAGA	3	30	79	1	17	3	6.6	0.0191	1	236	90	73	45	28	0.0991625	32.75	126	3	0	3	1	1	1	1	4.3217	18.3265	7.10574	3.678	0.340863	4.88501	14.1646	0.389599	5	0	0	5	0	0	0	5	0	0	30	0	0	0	50	0	0
FAGA	3	37.5	89.5	1	16	5	7.3	0.0144	1	236	90	73	45	28	0.0991625	32.75	126	3	0	3	1	1	1	1	4.3217	18.3265	7.10574	3.678	0.340863	4.88501	14.1646	0.389599	5	0	0	5	0	0	0	5	0	0	30	0	0	0	50	0	0
FAGA	3	34.5	90	1	16	6	6.5	0.0122	1	236	90	73	45	28	0.0991625	32.75	126	3	0	3	1	1	1	1	4.3217	18.3265	7.10574	3.678	0.340863	4.88501	14.1646	0.389599	5	0	0	5	0	0	0	5	0	0	30	0	0	0	50	0	0
FAGA	2	49.5	110	1	13	5	7.4	0.0191	1	236	90	73	45	28	0.0991625	32.75	126	3	0	3	1	1	1	1	4.3217	18.3265	7.10574	3.678	0.340863	4.88501	14.1646	0.389599	5	0	0	5	0	0	0	5	0	0	30	0	0	0	50	0	0
FAGA	2	32	81.5	1	15	4	8.1	0.032	1	236	90	73	45	28	0.0991625	32.75	126	3	0	3	1	1	1	1	4.3217	18.3265	7.10574	3.678	0.340863	4.88501	14.1646	0.389599	5	0	0	5	0	0	0	5	0	0	30	0	0	0	50	0	0
FAGA	3	40	100	1	17	5	7	0.0164	1	236	90	73	45	28	0.0991625	32.75	126	3	0	3	1	1	1	1	4.3217	18.3265	7.10574	3.678	0.340863	4.88501	14.1646	0.389599	5	0	0	5	0	0	0	5	0	0	30	0	0	0	50	0	0
FAGA	3	35	104	1	17	5	8.7	0.0136	1	236	90	73	45	28	0.0991625	32.75	126	3	0	3	1	1	1	1	4.3217	18.3265	7.10574	3.678	0.340863	4.88501	14.1646	0.389599	5	0	0	5	0	0	0	5	0	0	30	0	0	0	50	0	0
FAGA	3	30	93.5	1	18	5	5.2	0.0272	1	236	90	73	45	28	0.0991625	32.75	126	3	0	3	1	1	1	1	4.3217	18.3265	7.10574	3.678	0.340863	4.88501	14.1646	0.389599	5	0	0	5	0	0	0	5	0	0	30	0	0	0	50	0	0
FAGA	4	35	97	1	13	4	4.9	0.001	1	236	90	73	45	28	0.0991625	32.75	126	3	0	3	1	1	1	1	4.3217	18.3265	7.10574	3.678	0.340863	4.88501	14.1646	0.389599	5	0	0	5	0	0	0	5	0	0	30	0	0	0	50	0	0
FAGA	2	34	70	1	15	3	4	0.0173	1	236	90	73	45	28	0.0991625	32.75	126	3	0	3	1	1	1	1	4.3217	18.3265	7.10574	3.678	0.340863	4.88501	14.1646	0.389599	5	0	0	5	0	0	0	5	0	0	30	0	0	0	50	0	0
FAGA	2	39	90.5	1	13	3	4.8	0.0178	1	236	90	73	45	28	0.0991625	32.75	126	3	0	3	1	1	1	1	4.3217	18.3265	7.10574	3.678	0.340863	4.88501	14.1646	0.389599	5	0	0	5	0	0	0	5	0	0	30	0	0	0	50	0	0
FAGA	2	34	40	1	11	1	4.1	0.0263	1	236	90	73	45	28	0.0991625	32.75	126	3	0	3	1	1	1	1	4.3217	18.3265	7.10574	3.678	0.340863	4.88501	14.1646	0.389599	5	0	0	5	0	0	0	5	0	0	30	0	0	0	50	0	0
FAGA	3	38	101.5	1	13	3	6.4	0.0016	1	236	90	73	45	28	0.0991625	32.75	126	3	0	3	1	1	1	1	4.3217	18.3265	7.10574	3.678	0.340863	4.88501	14.1646	0.389599	5	0	0	5	0	0	0	5	0	0	30	0	0	0	50	0	0
FAGA	2	30	80.5	1	14	4	4.3	md	0	236	90	73	45	28	0.0991625	32.75	126	3	0	3	1	1	1	1	4.3217	18.3265	7.10574	3.678	0.340863	4.88501	14.1646	0.389599	5	0	0	5	0	0	0	5	0	0	30	0	0	0	50	0	0
FAGB	2	41.5	67	1	13	1	4.1	0.0113	1	67	8	31	16	12	0.121205	41.11	111	2	0	2	1	1	1	1	3.1019	11.1072	6.31253	3.584	0.503118	7.62072	15.0722	0.367976	0	0	0	0	0	0	0	5	0	0	10	0	0	0	0	0	0
FAGB	2	49	133.5	1	16	4	9.3	0.0348	1	67	8	31	16	12	0.121205	41.11	111	2	0	2	1	1	1	1	3.1019	11.1072	6.31253	3.584	0.503118	7.62072	15.0722	0.367976	0	0	0	0	0	0	0	5	0	0	10	0	0	0	0	0	0
FAGB	4	47	124	1	19	5	7	0.0054	1	67	8	31	16	12	0.121205	41.11	111	2	0	2	1	1	1	1	3.1019	11.1072	6.31253	3.584	0.503118	7.62072	15.0722	0.367976	0	0	0	0	0	0	0	5	0	0	10	0	0	0	0	0	0
FAGB	6	49	102	1	7	3	6.9	0.0314	1	67	8	31	16	12	0.121205	41.11	111	2	0	2	1	1	1	1	3.1019	11.1072	6.31253	3.584	0.503118	7.62072	15.0722	0.367976	0	0	0	0	0	0	0	5	0	0	10	0	0	0	0	0	0
FAGB	3	39	91.5	1	18	2	5.5	0.006	1	67	8	31	16	12	0.121205	41.11	111	2	0	2	1	1	1	1	3.1019	11.1072	6.31253	3.584	0.503118	7.62072	15.0722	0.367976	0	0	0	0	0	0	0	5	0	0	10	0	0	0	0	0	0
FAGB	4	40	76	1	17	1	3.8	0.0018	1	67	8	31	16	12	0.121205	41.11	111	2	0	2	1	1	1	1	3.1019	11.1072	6.31253	3.584	0.503118	7.62072	15.0722	0.367976	0	0	0	0	0	0	0	5	0	0	10	0	0	0	0	0	0
FAGB	3	38	64	1	14	1	4	0.045	1	67	8	31	16	12	0.121205	41.11	111	2	0	2	1	1	1	1	3.1019	11.1072	6.31253	3.584	0.503118	7.62072	15.0722	0.367976	0	0	0	0	0	0	0	5	0	0	10	0	0	0	0	0	0
FAGB	2	35	63.5	1	15	1	3.7	0.0013	1	67	8	31	16	12	0.121205	41.11	111	2	0	2	1	1	1	1	3.1019	11.1072	6.31253	3.584	0.503118	7.62072	15.0722	0.367976	0	0	0	0	0	0	0	5	0	0	10	0	0	0	0	0	0
MCA	2	32	75	1	16	3	7	0.0295	1	400	64	163	94	79	0.0840275	29.24	330	7.5	27	3	1	2	0	0	14.382	92.7581	14.0159	3.912	0.230338	2.59431	11.1317	0.167927	0	0	5	0	5	5	0	0	0	5	0	50	5	0	0	0	0
MCA	2	49	73.5	1	14	5	5.9	0.0497	1	400	64	163	94	79	0.0840275	29.24	330	7.5	27	3	1	2	0	0	14.382	92.7581	14.0159	3.912	0.230338	2.59431	11.1317	0.167927	0	0	5	0	5	5	0	0	0	5	0	50	5	0	0	0	0
MCA	2	39	55	1	11	3	4.8	0.0224	1	400	64	163	94	79	0.0840275	29.24	330	7.5	27	3	1	2	0	0	14.382	92.7581	14.0159	3.912	0.230338	2.59431	11.1317	0.167927	0	0	5	0	5	5	0	0	0	5	0	50	5	0	0	0	0
MCA	2	48.5	86.5	1	15	5	7.3	0.043	1	400	64	163	94	79	0.0840275	29.24	330	7.5	27	3	1	2	0	0	14.382	92.7581	14.0159	3.912	0.230338	2.59431	11.1317	0.167927	0	0	5	0	5	5	0	0	0	5	0	50	5	0	0	0	0
MCA	2	37	47	1	11	3	3.5	0.0258	1	400	64	163	94	79	0.0840275	29.24	330	7.5	27	3	1	2	0	0	14.382	92.7581	14.0159	3.912	0.230338	2.59431	11.1317	0.167927	0	0	5	0	5	5	0	0	0	5	0	50	5	0	0	0	0
MCA	4	41	65.5	1	14	4	6.5	0.027	1	400	64	163	94	79	0.0840275	29.24	330	7.5	27	3	1	2	0	0	14.382	92.7581	14.0159	3.912	0.230338	2.59431	11.1317	0.167927	0	0	5	0	5	5	0	0	0	5	0	50	5	0	0	0	0
MCA	3	40.5	60	1	14	5	4.5	0.0344	1	400	64	163	94	79	0.0840275	29.24	330	7.5	27	3	1	2	0	0	14.382	92.7581	14.0159	3.912	0.230338	2.59431	11.1317	0.167927	0	0	5	0	5	5	0	0	0	5	0	50	5	0	0	0	0
MCA	4	48	93	1	14	5	5.8	0.0205	1	400	64	163	94	79	0.0840275	29.24	330	7.5	27	3	1	2	0	0	14.382	92.7581	14.0159	3.912	0.230338	2.59431	11.1317	0.167927	0	0	5	0	5	5	0	0	0	5	0	50	5	0	0	0	0
MCA	2	53	74	1	13	4	6.6	0.0426	1	400	64	163	94	79	0.0840275	29.24	330	7.5	27	3	1	2	0	0	14.382	92.7581	14.0159	3.912	0.230338	2.59431	11.1317	0.167927	0	0	5	0	5	5	0	0	0	5	0	50	5	0	0	0	0
MCA	3	38	65.5	1	14	5	5.4	0.0305	1	400	64	163	94	79	0.0840275	29.24	330	7.5	27	3	1	2	0	0	14.382	92.7581	14.0159	3.912	0.230338	2.59431	11.1317	0.167927	0	0	5	0	5	5	0	0	0	5	0	50	5	0	0	0	0
MCA	2	54	82	1	15	6	6.8	0.0416	1	400	64	163	94	79	0.0840275	29.24	330	7.5	27	3	1	2	0	0	14.382	92.7581	14.0159	3.912	0.230338	2.59431	11.1317	0.167927	0	0	5	0	5	5	0	0	0	5	0	50	5	0	0	0	0
MCA	3	39	86	1	13	5	4.5	0.0327	1	400	64	163	94	79	0.0840275	29.24	330	7.5	27	3	1	2	0	0	14.382	92.7581	14.0159	3.912	0.230338	2.59431	11.1317	0.167927	0	0	5	0	5	5	0	0	0	5	0	50	5	0	0	0	0
MCA	2	45.5	47.5	1	13	3	3.6	0.0377	1	400	64	163	94	79	0.0840275	29.24	330	7.5	27	3	1	2	0	0	14.382	92.7581	14.0159	3.912	0.230338	2.59431	11.1317	0.167927	0	0	5	0	5	5	0	0	0	5	0	50	5	0	0	0	0
MCA	2	52	79	1	13	5	7.2	0.0401	1	400	64	163	94	79	0.0840275	29.24	330	7.5	27	3	1	2	0	0	14.382	92.7581	14.0159	3.912	0.230338	2.59431	11.1317	0.167927	0	0	5	0	5	5	0	0	0	5	0	50	5	0	0	0	0
MCA	2	59	76	1	12	6	7.5	0.0458	1	400	64	163	94	79	0.0840275	29.24	330	7.5	27	3	1	2	0	0	14.382	92.7581	14.0159	3.912	0.230338	2.59431	11.1317	0.167927	0	0	5	0	5	5	0	0	0	5	0	50	5	0	0	0	0
MCB	3	40	44.5	1	12	1	6.3	0.0112	1	84	22	34	15	13	0.0714204	22.81	470	5	20	2	1	2	0	0	15.8428	130.104	18.7745	4.196	0.283457	3.49028	12.0657	0.377731	5	0	0	0	0	0	0	0	0	5	5	5	0	5	0	0	0
MCB	3	35	43	1	15	1	5.9	0.0076	1	84	22	34	15	13	0.0714204	22.81	470	5	20	2	1	2	0	0	15.8428	130.104	18.7745	4.196	0.283457	3.49028	12.0657	0.377731	5	0	0	0	0	0	0	0	0	5	5	5	0	5	0	0	0
MCB	3	51	34.5	1	14	1	6.8	0.009	1	84	22	34	15	13	0.0714204	22.81	470	5	20	2	1	2	0	0	15.8428	130.104	18.7745	4.196	0.283457	3.49028	12.0657	0.377731	5	0	0	0	0	0	0	0	0	5	5	5	0	5	0	0	0
MCB	5	27	35	1	10	1	3.2	0.0076	1	84	22	34	15	13	0.0714204	22.81	470	5	20	2	1	2	0	0	15.8428	130.104	18.7745	4.196	0.283457	3.49028	12.0657	0.377731	5	0	0	0	0	0	0	0	0	5	5	5	0	5	0	0	0
MCB	3	26	35	1	14	1	4	md	0	84	22	34	15	13	0.0714204	22.81	470	5	20	2	1	2	0	0	15.8428	130.104	18.7745	4.196	0.283457	3.49028	12.0657	0.377731	5	0	0	0	0	0	0	0	0	5	5	5	0	5	0	0	0
MCB	2	31	40.5	1	12	1	3.5	md	0	84	22	34	15	13	0.0714204	22.81	470	5	20	2	1	2	0	0	15.8428	130.104	18.7745	4.196	0.283457	3.49028	12.0657	0.377731	5	0	0	0	0	0	0	0	0	5	5	5	0	5	0	0	0
MCB	1	38	32	1	15	1	4.7	md	0	84	22	34	15	13	0.0714204	22.81	470	5	20	2	1	2	0	0	15.8428	130.104	18.7745	4.196	0.283457	3.49028	12.0657	0.377731	5	0	0	0	0	0	0	0	0	5	5	5	0	5	0	0	0
MCB	3	29.5	61.5	1	12	1	6	md	0	84	22	34	15	13	0.0714204	22.81	470	5	20	2	1	2	0	0	15.8428	130.104	18.7745	4.196	0.283457	3.49028	12.0657	0.377731	5	0	0	0	0	0	0	0	0	5	5	5	0	5	0	0	0
MCB	2	21	32.5	1	14	1	5.5	md	0	84	22	34	15	13	0.0714204	22.81	470	5	20	2	1	2	0	0	15.8428	130.104	18.7745	4.196	0.283457	3.49028	12.0657	0.377731	5	0	0	0	0	0	0	0	0	5	5	5	0	5	0	0	0
MCB	2	30.5	43.5	1	12	2	5.2	md	0	84	22	34	15	13	0.0714204	22.81	470	5	20	2	1	2	0	0	15.8428	130.104	18.7745	4.196	0.283457	3.49028	12.0657	0.377731	5	0	0	0	0	0	0	0	0	5	5	5	0	5	0	0	0
MCB	3	40	55.5	1	16	3	5.9	md	0	84	22	34	15	13	0.0714204	22.81	470	5	20	2	1	2	0	0	15.8428	130.104	18.7745	4.196	0.283457	3.49028	12.0657	0.377731	5	0	0	0	0	0	0	0	0	5	5	5	0	5	0	0	0
MCB	2	27	47.5	1	11	2	6.4	md	0	84	22	34	15	13	0.0714204	22.81	470	5	20	2	1	2	0	0	15.8428	130.104	18.7745	4.196	0.283457	3.49028	12.0657	0.377731	5	0	0	0	0	0	0	0	0	5	5	5	0	5	0	0	0
MCB	2	30	30.5	1	7	1	5	md	0	84	22	34	15	13	0.0714204	22.81	470	5	20	2	1	2	0	0	15.8428	130.104	18.7745	4.196	0.283457	3.49028	12.0657	0.377731	5	0	0	0	0	0	0	0	0	5	5	5	0	5	0	0	0
MCB	2	38	43.5	1	12	1	6	md	0	84	22	34	15	13	0.0714204	22.81	470	5	20	2	1	2	0	0	15.8428	130.104	18.7745	4.196	0.283457	3.49028	12.0657	0.377731	5	0	0	0	0	0	0	0	0	5	5	5	0	5	0	0	0
MCB	4	35.5	54.5	1	16	1	5	md	0	84	22	34	15	13	0.0714204	22.81	470	5	20	2	1	2	0	0	15.8428	130.104	18.7745	4.196	0.283457	3.49028	12.0657	0.377731	5	0	0	0	0	0	0	0	0	5	5	5	0	5	0	0	0
CUS	4	56.5	72	1	14	1	4.1	0.0034	1	209	9	146	33	21	0.154616	61.4	140	12	0	3	2	1	\	1	5.62134	23.9056	11.3379	3.396	0.399232	6.15606	15.419	1.37102	0	30	0	0	0	0	10	0	0	0	30	0	10	0	10	10	5
CUS	4	38	41	1	11	1	3.5	0.0028	1	209	9	146	33	21	0.154616	61.4	140	12	0	3	2	1	1	1	5.62134	23.9056	11.3379	3.396	0.399232	6.15606	15.419	1.37102	0	30	0	0	0	0	10	0	0	0	30	0	10	0	10	10	5
CUS	3	57	67.5	1	23	4	5.9	0.0023	1	209	9	146	33	21	0.154616	61.4	140	12	0	3	2	1	1	1	5.62134	23.9056	11.3379	3.396	0.399232	6.15606	15.419	1.37102	0	30	0	0	0	0	10	0	0	0	30	0	10	0	10	10	5
CUS	4	64	76	1	19	6	6.2	0.0087	1	209	9	146	33	21	0.154616	61.4	140	12	0	3	2	1	1	1	5.62134	23.9056	11.3379	3.396	0.399232	6.15606	15.419	1.37102	0	30	0	0	0	0	10	0	0	0	30	0	10	0	10	10	5
CUS	5	65	71.5	1	15	2	5.7	0.0053	1	209	9	146	33	21	0.154616	61.4	140	12	0	3	2	1	1	1	5.62134	23.9056	11.3379	3.396	0.399232	6.15606	15.419	1.37102	0	30	0	0	0	0	10	0	0	0	30	0	10	0	10	10	5
CUS	2	60	50	1	13	2	3.7	md	1	209	9	146	33	21	0.154616	61.4	140	12	0	3	2	1	1	1	5.62134	23.9056	11.3379	3.396	0.399232	6.15606	15.419	1.37102	0	30	0	0	0	0	10	0	0	0	30	0	10	0	10	10	5
CUS	2	45	79	1	14	3	4.5	md	1	209	9	146	33	21	0.154616	61.4	140	12	0	3	2	1	1	1	5.62134	23.9056	11.3379	3.396	0.399232	6.15606	15.419	1.37102	0	30	0	0	0	0	10	0	0	0	30	0	10	0	10	10	5
CUS	3	51	70.5	1	16	4	6.4	md	1	209	9	146	33	21	0.154616	61.4	140	12	0	3	2	1	1	1	5.62134	23.9056	11.3379	3.396	0.399232	6.15606	15.419	1.37102	0	30	0	0	0	0	10	0	0	0	30	0	10	0	10	10	5
CUS	3	53	93	1	18	2	4.9	md	1	209	9	146	33	21	0.154616	61.4	140	12	0	3	2	1	1	1	5.62134	23.9056	11.3379	3.396	0.399232	6.15606	15.419	1.37102	0	30	0	0	0	0	10	0	0	0	30	0	10	0	10	10	5
TO	3	54	94	1	17	4	8	0.0064	1	655	420	190	30	15	0.111791	39.77	300	4	30	1	1	2	1	1	43.5788	24.95	6.11768	4.112	0.185714	2.62991	14.0494	0.19671	0	0	0	5	0	0	0	0	0	0	0	50	5	0	0	0	5
TO	2	48	96	1	16	4	9.2	0.0069	1	655	420	190	30	15	0.111791	39.77	300	4	30	1	1	2	1	1	43.5788	24.95	6.11768	4.112	0.185714	2.62991	14.0494	0.19671	0	0	0	5	0	0	0	0	0	0	0	50	5	0	0	0	5
TO	2	60	107	1	15	7	8.9	0.0093	1	655	420	190	30	15	0.111791	39.77	300	4	30	1	1	2	1	1	43.5788	24.95	6.11768	4.112	0.185714	2.62991	14.0494	0.19671	0	0	0	5	0	0	0	0	0	0	0	50	5	0	0	0	5
TO	3	56	95	1	16	6	7	0.0057	1	655	420	190	30	15	0.111791	39.77	300	4	30	1	1	2	1	1	43.5788	24.95	6.11768	4.112	0.185714	2.62991	14.0494	0.19671	0	0	0	5	0	0	0	0	0	0	0	50	5	0	0	0	5
TO	2	44	73	1	14	1	7.5	0.007	1	655	420	190	30	15	0.111791	39.77	300	4	30	1	1	2	1	1	43.5788	24.95	6.11768	4.112	0.185714	2.62991	14.0494	0.19671	0	0	0	5	0	0	0	0	0	0	0	50	5	0	0	0	5
TO	4	46	93	1	18	5	5.5	0.006	1	655	420	190	30	15	0.111791	39.77	300	4	30	1	1	2	1	1	43.5788	24.95	6.11768	4.112	0.185714	2.62991	14.0494	0.19671	0	0	0	5	0	0	0	0	0	0	0	50	5	0	0	0	5
TO	3	54	109	1	19	5	10.5	0.013	1	655	420	190	30	15	0.111791	39.77	300	4	30	1	1	2	1	1	43.5788	24.95	6.11768	4.112	0.185714	2.62991	14.0494	0.19671	0	0	0	5	0	0	0	0	0	0	0	50	5	0	0	0	5
TO	5	51	73	1	13	3	6.7	0.0049	1	655	420	190	30	15	0.111791	39.77	300	4	30	1	1	2	1	1	43.5788	24.95	6.11768	4.112	0.185714	2.62991	14.0494	0.19671	0	0	0	5	0	0	0	0	0	0	0	50	5	0	0	0	5
TO	3	49.5	94.5	1	18	4	10.6	0.0102	1	655	420	190	30	15	0.111791	39.77	300	4	30	1	1	2	1	1	43.5788	24.95	6.11768	4.112	0.185714	2.62991	14.0494	0.19671	0	0	0	5	0	0	0	0	0	0	0	50	5	0	0	0	5
TO	4	55.5	114.5	1	17	4	12.5	0.0551	1	655	420	190	30	15	0.111791	39.77	300	4	30	1	1	2	1	1	43.5788	24.95	6.11768	4.112	0.185714	2.62991	14.0494	0.19671	0	0	0	5	0	0	0	0	0	0	0	50	5	0	0	0	5
TO	3	46	86	1	18	3	7.1	0.005	1	655	420	190	30	15	0.111791	39.77	300	4	30	1	1	2	1	1	43.5788	24.95	6.11768	4.112	0.185714	2.62991	14.0494	0.19671	0	0	0	5	0	0	0	0	0	0	0	50	5	0	0	0	5
TO	2	55	93.5	1	19	4	12.7	0.0132	1	655	420	190	30	15	0.111791	39.77	300	4	30	1	1	2	1	1	43.5788	24.95	6.11768	4.112	0.185714	2.62991	14.0494	0.19671	0	0	0	5	0	0	0	0	0	0	0	50	5	0	0	0	5
TO	2	42	105	1	20	4	7.3	0.0036	1	655	420	190	30	15	0.111791	39.77	300	4	30	1	1	2	1	1	43.5788	24.95	6.11768	4.112	0.185714	2.62991	14.0494	0.19671	0	0	0	5	0	0	0	0	0	0	0	50	5	0	0	0	5
TO	5	38	71.5	1	19	1	5.8	0.011	1	655	420	190	30	15	0.111791	39.77	300	4	30	1	1	2	1	1	43.5788	24.95	6.11768	4.112	0.185714	2.62991	14.0494	0.19671	0	0	0	5	0	0	0	0	0	0	0	50	5	0	0	0	5
TO	4	39	115	1	16	5	6.3	0.0008	1	655	420	190	30	15	0.111791	39.77	300	4	30	1	1	2	1	1	43.5788	24.95	6.11768	4.112	0.185714	2.62991	14.0494	0.19671	0	0	0	5	0	0	0	0	0	0	0	50	5	0	0	0	5
[truncated: 35 more columns]
