# Supplementary material for: Genetic differentiation, local adaptation and phenotypic plasticity in fragmented populations of a rare forest herb
Source: PeerJ. 2018 Jun 13;6:e4929. doi: 10.7717/peerj.4929 (PMC6004105; doi:10.7717/peerj.4929)
Supplement: Data S2 [file peerj-06-4929-s006.xlsx]

## Sheet: GD
1	151	10	20	13	20	14	13	20	18	8	10	15	3	53	73	25
	Foglio1	Binary Distance	MCA	MCB	TO	FagA	FagB	CUS	GRAF	SC	RIV1	RIV2
1	2	3	4	5	6	7	8	9	10	11	12	13	14	15	16	17	18	19	20	21	22	23	24	25	26	27	28	29	30	31	32	33	34	35	36	37	38	39	40	41	42	43	44	45	46	47	48	49	50
0
13	0
14	13	0
17	16	5	0
8	9	8	13	0
14	11	12	13	10	0
14	11	12	15	12	10	0
17	12	19	20	13	17	17	0
17	18	19	20	15	13	19	12	0
19	12	17	20	13	19	17	18	16	0
16	17	20	21	16	14	16	19	11	17	0
16	17	20	23	16	14	18	15	9	17	8	0
20	19	22	23	18	18	20	17	11	15	8	6	0
15	12	15	14	11	11	15	12	16	12	15	13	17	0
17	18	21	24	17	17	15	18	14	20	9	9	13	18	0
22	23	24	25	22	20	18	23	21	25	10	16	18	21	9	0
17	18	21	24	17	17	19	18	12	20	9	7	13	16	4	11	0
17	14	19	18	15	15	19	16	12	18	7	9	9	14	10	13	8	0
20	19	22	25	18	18	22	17	15	21	12	6	10	15	11	16	7	11	0
23	20	23	24	21	21	23	22	18	18	15	13	15	16	14	21	12	14	11	0
19	20	21	24	19	19	19	22	16	20	13	11	15	18	10	15	10	14	11	10	0
20	21	22	25	18	16	24	21	15	19	20	16	16	17	19	24	19	19	18	19	13	0
20	21	22	23	18	20	22	19	11	19	12	10	12	15	13	18	11	11	12	11	9	10	0
22	21	20	23	20	18	22	19	13	19	18	14	16	15	19	22	19	19	16	19	13	10	10	0
18	23	16	21	16	18	20	27	23	27	20	20	24	21	23	22	23	23	22	25	15	20	20	18	0
16	19	18	21	16	12	20	21	17	25	18	16	20	17	19	22	19	19	18	23	15	10	16	12	10	0
17.475	18.475	19.475	21.475	17.475	16.475	16.475	21.475	15.475	19.475	11.475	14.475	17.475	14.475	15.475	16.475	15.475	16.475	17.475	14.475	7.5303	15.5303	9.5303	10.5303	12.5303	14.5303	0
20	21	20	23	18	20	20	21	17	21	14	14	16	17	15	16	15	17	14	15	7	12	10	10	14	14	7.5303	0
20	23	22	27	18	22	24	23	15	23	14	12	12	21	15	18	13	13	14	15	11	12	6	12	18	16	13.5303	8	0
24	23	24	25	22	24	20	21	19	21	16	18	14	23	15	14	19	17	20	21	13	18	14	16	20	18	13.5303	12	14	0
18	21	18	23	16	16	22	19	13	19	18	12	14	15	19	22	19	19	14	17	9	8	10	8	14	12	10.5303	8	10	14	0
21	22	21	24	19	19	21	20	16	20	17	13	15	16	18	21	18	18	15	18	10	9	9	7	19	13	10.5303	7	11	13	7	0
22	23	22	25	20	22	20	21	15	19	12	12	12	17	15	18	15	15	12	15	11	18	10	14	20	20	13.5303	10	12	16	12	9	0
33.4605	34.4605	33.4605	33.4605	31.4605	27.4605	35.4605	31.4605	27.4605	32.4605	29.4605	25.4605	28.4605	26.4605	30.4605	33.4605	28.4605	25.4605	27.4605	28.4605	28.4332	21.4332	23.4332	27.4332	35.4332	25.4332	30.7174	27.4332	25.4332	32.4332	25.4332	24.4332	27.4332	0
30	31	28	27	26	22	26	25	23	29	26	22	24	21	25	26	25	21	24	27	23	20	20	24	28	24	25.2842	24	24	24	20	21	22	14.5146	0
33	32	33	32	31	31	31	30	26	30	23	23	23	28	22	21	24	20	25	28	22	23	21	23	31	29	23.2842	21	23	23	25	22	23	21.5146	17	0
32	31	32	31	30	28	32	27	25	31	22	20	22	27	19	22	21	19	20	23	21	24	20	24	32	28	24.2842	24	24	24	24	23	24	18.5146	16	9	0
26	27	26	25	22	20	26	25	21	29	22	20	22	21	25	26	25	21	22	29	25	20	20	22	26	22	23.2842	22	24	26	20	21	22	16.5146	12	17	14	0
27	28	27	26	23	23	25	26	20	28	21	19	19	24	22	25	24	20	21	24	20	21	17	21	25	25	22.2842	19	19	21	19	20	17	19.5146	13	16	15	9	0
25	26	25	24	21	21	25	20	22	26	25	21	23	18	26	29	26	22	23	28	26	21	21	23	27	23	26.2842	25	25	25	21	22	23	19.5146	11	18	15	11	10	0
23	22	23	24	21	21	25	26	24	28	21	23	27	20	24	25	24	22	23	28	26	23	23	23	23	19	24.2842	21	25	29	25	24	23	26.5146	27	24	25	17	18	18	0
26	27	28	29	24	22	24	27	21	27	18	20	22	23	19	20	23	21	22	27	25	20	20	22	24	18	23.2842	20	22	22	22	21	20	23.5146	20	19	20	16	17	21	11	0
27	28	29	30	25	25	25	26	22	28	17	19	21	24	18	19	22	20	21	26	24	23	19	21	25	21	22.2842	19	21	21	23	20	19	26.5146	23	16	17	19	18	20	12	3	0
26	27	28	29	24	24	26	27	25	25	22	22	22	21	25	28	27	25	24	27	25	20	22	22	28	20	25.2842	22	24	24	22	19	22	21.5146	22	25	24	16	17	19	13	10	11	0
33.0421	33.0421	33.0421	35.0421	31.0421	34.0421	34.0421	28.0421	22.0421	27.0421	21.0421	23.0421	21.0421	31.0421	22.0421	26.0421	22.0421	21.0421	24.0421	23.0421	24.3553	26.3553	20.3553	25.3553	30.3553	28.3553	26.7053	24.3553	21.3553	23.3553	27.3553	25.3553	24.3553	28.5556	28.0409	22.0409	21.0409	26.0409	25.0409	29.0409	23.0409	16.0409	15.0409	18.0409	0
32	27	32	33	30	24	32	33	25	27	24	22	22	27	25	28	25	21	24	27	25	18	22	24	32	22	28.2842	26	24	28	24	23	28	23.5146	22	21	22	20	21	25	19	16	19	16	20.0409	0
37	32	35	34	33	27	29	34	28	32	27	27	25	32	28	31	32	26	29	34	32	27	29	29	35	27	33.2842	31	31	27	29	28	29	25.5146	21	24	23	15	16	22	20	15	18	15	23.0409	11	0
31	28	33	34	29	29	33	30	30	30	27	25	29	26	30	31	28	24	27	32	32	27	27	29	31	27	33.2842	31	29	35	31	30	33	28.5146	25	26	25	19	26	22	20	19	20	19	21.0409	15	16	0
35	30	33	36	33	29	33	36	28	30	27	25	23	32	30	31	30	26	27	32	28	25	27	25	33	25	28.2842	27	27	27	25	24	27	30.5146	27	22	27	25	26	30	24	21	22	21	23.0409	11	16	24	0
32	27	32	33	30	24	32	31	23	27	22	20	22	25	27	30	25	21	22	27	27	24	22	26	32	24	28.2842	28	26	28	24	25	24	23.5146	22	27	24	20	21	23	21	18	21	18	24.0409	12	15	21	11	0
32	29	30	33	28	28	32	33	27	27	28	24	26	29	27	32	27	25	26	27	27	24	24	28	32	26	30.2842	30	28	30	26	27	28	23.5146	24	29	24	18	21	25	23	22	25	18	24.0409	16	17	21	15	8
34	29	34	35	32	30	36	35	27	31	26	26	28	31	29	32	29	25	28	31	29	28	26	26	34	28	30.2842	28	28	30	28	27	28	27.5146	32	27	28	28	25	29	19	20	19	20	24.0409	16	19	23	15	12
36	33	36	37	34	30	36	29	25	27	24	24	24	29	27	28	29	25	26	29	31	26	26	26	40	30	32.2842	30	28	28	26	27	26	23.5146	28	29	26	28	27	27	27	18	19	22	22.0409	22	21	25	21	16
25	26	27	28	25	19	23	24	16	22	17	15	19	16	22	23	20	20	19	22	20	21	17	17	29	23	19.3929	21	21	25	17	16	15	24.4211	19	24	23	17	20	20	24	21	22	21	30.297	21	24	26	22	19
29	26	31	32	27	23	29	26	22	26	21	19	21	20	24	29	22	20	23	24	24	21	17	21	33	27	23.3929	25	21	29	23	20	21	24.4211	25	30	27	25	24	26	30	27	28	27	30.297	27	34	30	36	27
27	24	29	30	25	21	23	22	22	26	21	21	23	18	22	25	22	20	21	22	22	19	17	21	31	23	23.3929	23	21	27	21	18	17	22.4211	21	28	25	21	22	22	26	23	26	25	32.297	25	28	26	34	25
26	25	26	29	24	26	28	21	25	27	22	22	24	21	27	30	25	25	24	27	25	22	22	22	28	22	22.3929	20	24	28	24	21	24	29.4211	30	31	30	24	27	25	23	26	25	22	27.297	30	33	29	35	32
28	29	30	33	28	26	26	29	23	27	22	20	24	23	27	30	25	27	26	29	27	26	22	24	32	28	21.3929	26	26	32	26	25	26	31.4211	30	31	28	22	25	25	29	30	29	26	30.297	32	33	31	37	30
33	32	29	30	29	27	27	30	28	28	27	27	29	24	32	31	30	30	27	30	28	29	25	23	31	31	26.3929	27	29	31	27	26	27	34.4211	29	32	29	23	26	26	30	31	30	29	33.297	35	34	30	40	33
31	30	29	30	29	23	29	28	20	24	21	21	21	20	26	27	26	24	23	26	24	19	19	15	31	23	22.3929	21	21	25	17	18	19	28.4211	25	26	27	25	26	24	26	21	20	23	27.297	25	28	30	28	27
27	30	25	28	27	29	27	26	22	24	21	19	19	22	24	27	24	24	21	26	22	21	17	15	29	23	22.3929	19	19	23	19	16	17	30.4211	27	26	27	25	26	24	26	23	20	21	25.297	27	30	28	28	29
30	27	32	35	30	26	32	31	27	29	26	26	24	27	31	34	29	27	26	29	29	24	26	26	34	26	28.3929	30	28	32	26	29	28	35.4211	34	33	34	32	31	29	33	34	35	36	38.297	32	37	33	33	32
30	29	26	29	26	24	26	27	25	25	26	24	24	23	27	30	27	27	24	27	23	20	24	24	28	24	24.3929	24	28	26	20	23	24	31.4211	22	25	28	26	25	21	33	30	31	30	33.297	28	29	31	29	28
34	33	32	35	32	32	30	35	31	29	32	28	28	27	33	38	33	33	32	35	31	24	28	24	36	32	27.3929	28	30	34	28	25	30	37.4211	34	31	34	30	31	31	33	32	31	30	36.297	30	35	35	33	38
34	35	34	35	32	28	32	33	27	35	26	26	28	29	25	26	27	27	28	31	27	20	22	24	34	26	26.3929	22	22	28	24	23	26	27.4211	24	25	24	22	23	27	25	18	21	24	29.297	24	25	29	31	28
37	36	35	36	33	27	35	36	28	34	31	29	31	28	36	39	34	32	31	34	34	25	27	25	35	29	31.3929	31	29	37	27	28	31	30.4211	29	34	33	25	24	24	28	29	30	27	34.297	29	28	30	36	31
29	28	29	30	27	21	29	28	20	26	23	21	23	20	28	33	26	24	25	28	28	19	21	19	31	23	26.3929	25	23	31	21	22	25	26.4211	25	28	27	23	22	20	24	23	24	23	29.297	23	26	26	30	25
31	32	29	30	29	29	31	32	30	28	27	23	25	26	28	31	28	26	27	24	22	25	25	25	33	31	26.4295	23	25	29	23	22	25	26.4453	27	28	27	27	26	28	30	29	28	25	31.2389	29	32	32	32	33
36	35	34	35	32	28	34	37	27	31	28	28	30	29	31	36	29	27	32	29	31	26	24	28	38	32	30.4295	30	26	36	30	29	30	27.4453	30	33	32	30	29	31	33	28	29	32	31.2389	28	33	33	35	30
34	31	34	35	32	26	32	31	25	27	26	24	24	23	29	30	27	27	26	29	27	22	22	22	34	28	26.4295	24	24	28	22	23	24	27.4453	26	27	30	26	27	27	33	28	29	30	35.2389	28	35	35	29	26
26	27	24	27	24	22	24	25	21	23	24	20	22	21	23	28	25	25	24	25	21	18	20	20	28	22	21.4295	20	24	22	16	17	22	23.4453	22	27	24	24	23	23	31	24	25	26	32.2389	28	31	37	31	28
28	25	26	29	24	24	28	25	21	23	20	14	16	23	23	28	21	21	16	19	19	20	16	20	26	24	22.4295	20	18	24	18	19	18	25.4453	24	27	22	22	19	21	29	26	25	26	27.2389	24	27	25	29	22
28	27	28	31	26	22	28	27	19	25	22	18	20	21	25	32	23	23	22	25	25	20	18	20	30	24	22.4295	24	22	28	20	21	22	25.4453	26	29	26	22	23	25	29	26	27	26	29.2389	26	29	33	29	22
23	22	25	28	21	17	23	24	16	22	19	15	17	18	18	25	18	18	19	20	18	13	13	15	27	19	17.4295	19	17	23	15	16	19	24.4453	21	24	21	19	20	22	26	21	22	23	26.2389	21	28	30	26	21
27	28	29	30	25	23	29	26	22	26	21	17	19	20	24	29	22	20	21	22	20	19	17	23	29	25	23.4295	21	19	27	19	20	21	24.4453	23	28	25	23	20	22	28	27	26	23	30.2389	27	32	32	34	25
32	33	36	37	32	32	34	31	29	31	26	24	26	27	25	30	25	25	28	31	29	28	24	30	40	34	32.4295	30	26	30	30	29	30	31.4453	28	29	26	26	23	23	29	30	29	28	35.2389	30	33	31	37	28
29	30	29	30	27	27	31	28	24	28	23	19	21	22	26	31	24	22	23	26	24	23	19	23	31	27	27.4295	25	21	31	23	24	23	28.4453	27	30	27	23	20	22	26	29	28	25	32.2389	29	34	32	38	29
27	24	29	30	27	25	29	26	24	22	23	21	23	18	26	27	24	22	23	24	22	21	19	19	31	27	24.4295	25	23	27	21	22	23	28.4453	25	26	25	23	22	20	24	29	28	25	33.2389	27	32	24	34	27
29	28	25	24	25	25	27	22	22	22	25	21	21	20	28	27	26	22	23	22	20	21	19	23	29	27	25.4295	21	21	23	19	20	21	25.4453	23	28	25	23	22	22	30	31	30	25	30.2389	31	34	34	38	31
30	31	26	25	28	28	32	25	23	25	26	24	24	21	29	30	27	23	28	29	27	24	22	22	32	28	28.4295	28	26	28	24	25	26	28.4453	26	29	26	24	23	21	27	32	31	28	29.2389	32	35	33	39	32
34	31	34	35	30	28	30	31	23	27	22	26	26	29	25	28	27	27	26	29	29	28	26	30	36	32	30.6333	30	30	30	28	31	26	29.4921	26	27	24	22	23	25	27	18	21	26	26.9421	26	21	23	29	20
38	35	38	39	34	32	34	33	29	37	30	28	26	37	25	26	27	27	28	33	31	30	30	32	42	32	35.6333	32	28	28	32	31	32	32.4921	30	29	26	26	31	33	33	24	25	28	24.9421	26	23	27	25	30
33	32	35	38	31	31	31	32	28	30	25	23	25	30	24	29	24	26	23	28	28	27	25	29	37	31	31.6333	29	27	33	31	28	27	28.4921	27	24	21	23	28	26	26	21	20	25	23.9421	23	22	18	26	25
41	38	39	42	37	35	37	38	32	34	33	29	31	34	32	35	30	32	29	34	32	29	31	33	41	35	35.6333	33	33	39	33	32	33	28.4921	27	26	29	27	34	34	32	25	28	31	27.9421	25	28	24	24	29
38.55	37.55	36.55	38.55	32.55	31.55	33.55	35.55	31.55	37.55	32.55	30.55	32.55	34.55	29.55	35.55	31.55	31.55	31.55	34.55	32.25	30.25	30.25	31.25	40.25	36.25	36.6333	34.25	31.25	37.25	33.25	31.25	34.25	28.9658	25.4737	29.4737	26.4737	25.4737	22.4737	26.4737	28.4737	23.4737	24.4737	25.4737	30.9421	24.4737	21.4737	23.4737	29.4737	28.4737
36	31	32	35	30	30	30	33	29	31	30	26	28	31	27	32	27	29	26	29	25	28	26	28	32	30	30.6333	30	30	30	28	27	30	35.4921	28	29	26	26	25	27	29	26	25	26	26.9421	22	23	19	25	24
37	34	35	36	33	35	33	34	28	28	29	29	25	34	26	31	28	28	29	28	24	27	27	29	35	31	29.6333	27	29	25	29	26	27	33.4921	29	22	27	31	26	30	26	23	22	23	19.9421	21	24	30	18	27
39.55	36.55	37.55	39.55	35.55	34.55	34.55	32.55	28.55	30.55	29.55	29.55	25.55	33.55	28.55	30.55	30.55	30.55	30.55	31.55	29.25	29.25	29.25	26.25	35.25	33.25	29.6333	29.25	30.25	28.25	30.25	28.25	29.25	34.9658	32.4737	24.4737	27.4737	28.4737	27.4737	33.4737	23.4737	20.4737	19.4737	20.4737	15.9421	23.4737	24.4737	28.4737	20.4737	27.4737
37	32	37	38	33	29	35	36	28	32	29	27	29	32	28	33	28	26	27	30	28	25	27	29	39	29	33.6333	31	29	33	29	28	33	28.4921	29	28	25	25	26	28	26	21	22	23	24.9421	15	18	18	22	19
38	31	38	41	34	32	32	37	31	29	28	28	28	33	27	32	29	29	28	29	29	28	28	28	38	32	30.6333	30	30	32	32	29	30	33.4921	32	29	26	26	27	31	25	20	21	22	21.9421	20	19	19	23	24
35	30	33	34	31	29	31	34	28	28	25	25	27	28	26	27	26	24	25	28	24	27	25	27	33	31	27.6333	27	29	29	27	26	29	34.4921	29	28	25	25	28	32	30	25	26	25	26.9421	21	24	20	26	23
40	37	38	39	36	38	32	33	29	33	28	28	28	35	25	26	25	27	26	31	29	36	28	34	36	36	32.6333	32	32	28	34	33	28	32.4921	28	25	24	28	29	31	31	24	23	32	24.9421	30	25	27	29	28
33	26	33	34	29	27	33	28	24	26	23	23	25	26	28	29	26	22	25	28	28	23	23	25	35	29	29.6333	27	25	33	27	26	29	28.4921	27	26	25	23	26	26	24	21	22	23	22.9421	17	20	10	24	21
35	32	37	38	33	29	35	34	28	32	25	23	27	28	28	29	26	22	25	30	30	25	25	29	37	29	31.6333	29	27	35	29	28	29	22.4921	23	24	23	19	26	26	24	17	20	23	24.9421	15	18	14	24	21
32	29	34	37	30	30	30	31	27	29	22	20	22	29	21	24	23	21	22	27	25	24	22	24	34	28	26.6333	24	24	28	26	23	24	25.4921	28	23	22	22	27	29	23	18	17	22	21.9421	20	19	19	23	24
34	27	32	31	30	24	28	29	23	27	26	24	24	25	27	28	27	23	26	27	25	22	24	22	36	28	26.6333	26	26	28	24	23	26	24.4921	20	21	22	18	21	25	25	20	23	22	26.9421	14	15	19	21	22
32	25	30	29	28	26	26	25	23	23	24	22	22	21	27	28	25	21	24	25	25	24	22	22	36	30	26.6333	26	24	28	26	23	24	24.4921	22	23	24	20	23	23	23	22	23	20	24.9421	20	19	17	25	20
33	26	31	32	29	27	25	24	22	24	25	21	21	24	24	27	24	22	23	24	24	23	21	21	35	29	25.6333	25	23	25	25	22	23	25.4921	21	22	23	23	22	24	26	21	22	23	23.9421	21	18	20	24	21
32	27	32	33	28	26	28	31	25	27	24	24	20	29	25	28	27	23	26	27	27	24	24	24	36	28	27.6333	28	24	26	28	25	26	26.4921	26	27	26	24	25	29	27	22	23	22	24.9421	22	21	27	25	26
29	28	29	30	27	25	27	26	20	26	21	21	17	26	20	21	24	20	23	26	22	19	21	19	31	23	24.6333	23	21	19	19	20	21	25.4921	21	20	21	21	22	24	24	17	18	21	21.9421	19	16	24	18	21
32	27	30	29	30	26	32	29	23	25	22	20	20	25	25	28	23	17	22	23	25	22	20	24	32	24	28.7697	26	22	26	26	23	24	20.5263	22	23	20	22	21	23	17	16	17	16	16.0789	10	13	17	17	10
36	33	36	35	34	30	32	31	27	35	28	26	26	29	27	32	27	25	26	27	29	26	24	30	36	26	30.7697	30	28	30	30	29	28	30.5263	26	27	26	26	27	27	23	20	21	24	25.0789	18	15	23	23	20
33	30	35	34	31	27	29	30	28	32	27	27	27	26	26	29	28	24	27	28	28	25	27	27	37	27	29.7697	29	29	29	29	28	29	29.5263	27	26	25	23	26	26	24	21	22	23	30.0789	21	18	24	28	23
33	30	33	34	31	27	31	30	24	26	23	21	23	22	26	25	22	22	21	24	24	25	21	23	33	27	25.7697	27	25	27	23	24	23	28.5263	23	24	23	23	26	24	24	21	20	21	26.0789	21	26	26	22	17
29.7	30.7	32.7	34.7	31.7	28.7	31.7	31.7	28.7	26.7	25.7	24.7	25.7	26.7	27.7	28.7	27.7	27.7	26.7	27.7	25.5973	26.5973	26.5973	26.5973	30.5973	26.5973	26.367	27.5973	30.5973	26.5973	25.5973	26.5973	26.5973	33.094	28.5676	24.5676	26.5676	27.5676	30.5676	28.5676	25.5676	23.5676	22.5676	24.5676	25.6466	23.5676	29.5676	26.5676	21.5676	23.5676
34	31	34	35	30	32	32	29	27	29	24	24	22	27	23	26	25	23	24	27	23	28	24	26	32	28	26.7697	26	28	24	26	25	22	32.5263	28	27	26	26	25	31	27	26	25	22	25.0789	26	25	33	27	26
32	29	32	33	28	32	30	29	27	27	22	24	22	27	23	24	23	21	24	25	23	30	24	30	28	28	25.7697	26	26	22	28	27	24	32.5263	28	27	26	28	29	31	27	24	23	26	23.0789	32	31	33	31	30
29	28	29	30	27	27	27	28	26	26	19	21	19	22	20	23	20	20	19	16	18	25	19	25	27	23	20.7697	23	23	21	23	22	19	32.5263	29	32	29	31	30	32	28	27	26	23	26.0789	29	30	34	28	27
39	38	41	42	39	39	35	32	36	38	31	33	29	36	30	27	30	30	29	32	30	35	33	35	39	33	34.7697	33	33	27	35	30	29	39.5263	33	34	33	39	36	36	36	31	30	29	26.0789	33	32	38	32	35
31	30	31	32	29	31	29	28	24	26	21	21	17	26	22	25	22	20	21	24	22	27	21	25	31	27	26.7697	27	23	21	25	24	21	29.5263	25	24	21	23	24	24	24	21	18	17	18.0789	25	24	26	24	23
41	36	41	42	39	39	35	32	38	38	31	35	31	36	32	27	32	32	31	34	32	39	35	39	39	37	34.7697	35	37	29	37	32	29	43.5263	35	34	31	39	38	36	38	35	32	37	32.0789	37	36	42	34	35
34.0687	34.0687	34.0687	34.0687	32.0687	31.0687	33.0687	31.0687	27.0687	32.0687	28.0687	24.0687	24.0687	28.0687	27.0687	29.0687	27.0687	22.0687	27.0687	32.0687	27.7188	25.7188	25.7188	24.7188	31.7188	27.7188	30.1447	27.7188	26.7188	28.7188	26.7188	24.7188	27.7188	27.6053	25.0789	17.0789	22.0789	21.0789	24.0789	26.0789	20.0789	19.0789	16.0789	19.0789	22.0789	19.0789	18.0789	22.0789	18.0789	23.0789
42	35	44	43	38	36	40	41	37	35	36	34	36	31	37	40	37	33	36	35	37	34	32	36	44	36	36.7697	40	38	40	36	37	38	37.5263	36	39	36	32	37	37	35	32	33	32	40.0789	28	31	33	35	28
38	35	38	39	36	38	36	33	31	35	34	30	32	35	29	36	29	27	30	31	31	32	30	36	40	32	36.7697	34	32	32	34	33	34	32.5263	30	33	32	32	35	33	31	26	27	30	28.0789	30	27	29	31	30
42	39	42	43	40	36	38	37	35	39	30	30	32	35	29	32	31	27	30	35	35	36	32	38	42	34	38.7697	38	36	36	36	37	32	35.5263	32	35	32	34	37	35	35	28	27	34	36.0789	28	27	31	33	26
41	38	43	44	39	41	39	34	34	38	35	29	31	36	32	37	32	28	31	36	36	37	31	37	43	37	39.7697	39	35	35	37	36	35	35.5263	31	34	31	31	34	32	36	33	32	33	33.0789	29	28	28	32	27
39.0687	39.0687	41.0687	39.0687	37.0687	36.0687	38.0687	30.0688	30.0688	39.0687	33.0687	29.0688	31.0687	35.0687	32.0687	30.0687	30.0687	27.0688	30.0687	37.0687	36.7188	36.7188	30.7188	35.7188	44.7188	40.7188	39.1447	38.7188	33.7188	35.7188	35.7188	35.7188	34.7188	32.6053	28.0789	30.0789	27.0789	30.0789	31.0789	29.0789	39.0789	34.0789	31.0789	36.0789	35.0789	34.0789	31.0789	33.0789	37.0789	30.0789
40	37	40	43	38	40	38	37	37	39	38	32	36	39	35	38	35	33	34	39	39	40	34	40	48	44	40.7697	42	36	42	38	39	38	39.5263	36	39	36	36	39	37	41	40	39	40	40.0789	36	35	35	37	32
49	44	47	42	47	45	45	46	48	48	47	45	47	42	44	47	46	40	45	46	48	47	45	45	55	47	48.7292	49	49	51	51	48	49	39.5197	43	44	43	39	40	42	40	43	44	41	50.7039	43	38	42	48	45
46	45	46	47	44	44	40	39	39	43	38	36	36	41	33	38	35	35	34	39	37	44	38	42	50	46	43.7292	42	42	40	42	41	36	38.5197	36	39	36	40	39	41	45	42	41	42	42.7039	46	41	47	45	42
42.8833	43.8833	41.8833	41.8833	40.8833	38.8833	36.8833	39.8833	38.8833	42.8833	43.8833	42.8833	44.8833	40.8833	42.8833	41.8833	42.8833	42.8833	42.8833	44.8833	44.8205	42.8205	43.8205	40.8205	46.8205	43.8205	43.5497	42.8205	45.8205	45.8205	43.8205	42.8205	43.8205	37.1364	35.6167	40.6167	41.6167	36.6167	37.6167	37.6167	39.6167	37.6167	38.6167	38.6167	43.3206	43.6167	37.6167	39.6167	45.6167	45.6167
45.8833	46.8833	44.8833	44.8833	43.8833	41.8833	41.8833	40.8833	41.8833	45.8833	46.8833	45.8833	47.8833	43.8833	45.8833	44.8833	47.8833	45.8833	47.8833	47.8833	47.8205	47.8205	46.8205	45.8205	47.8205	48.8205	45.5497	47.8205	50.8205	46.8205	46.8205	47.8205	46.8205	40.1364	38.6167	45.6167	44.6167	39.6167	40.6167	40.6167	46.6167	44.6167	45.6167	45.6167	47.3206	50.6167	46.6167	48.6167	54.6167	50.6167
48	51	50	47	50	50	50	45	49	53	50	50	52	45	49	48	51	49	50	51	49	48	46	44	56	50	48.7292	48	50	52	50	47	48	45.5197	46	49	50	48	47	49	47	46	47	44	51.7039	48	51	49	49	48
55	56	55	50	55	53	53	50	54	58	57	57	57	50	56	57	56	54	55	58	62	59	55	55	63	59	59.7292	63	61	63	61	62	57	51.5197	49	56	55	49	52	48	56	55	56	55	58.7039	61	54	50	64	57
48	51	48	47	48	46	46	45	49	53	50	48	52	43	49	48	47	47	46	51	49	48	48	48	52	48	49.7292	50	52	54	48	49	48	41.5197	38	51	50	42	45	43	49	48	51	46	56.7039	52	49	49	55	48
44	49	44	43	44	44	46	45	49	51	48	46	50	41	45	44	47	45	46	51	47	46	46	44	46	46	48.7292	48	50	50	46	47	46	41.5197	40	47	46	40	41	41	43	46	47	44	53.7039	50	49	49	55	50
30	29	28	29	26	26	30	27	25	29	24	22	24	23	27	32	25	23	26	29	27	24	20	24	30	28	24.1	28	24	32	26	25	24	27.4526	24	29	26	22	21	21	27	28	29	26	26.9263	30	33	29	37	28
34	33	36	37	34	32	30	27	31	31	26	24	26	27	21	20	21	25	22	27	25	30	26	30	36	34	31.1	28	28	24	28	27	26	29.4526	24	27	24	28	27	27	33	28	27	28	31.9263	32	31	35	35	32
26	27	26	27	22	20	26	25	21	27	20	16	20	19	21	24	19	17	18	23	21	18	14	20	26	22	24.1	22	18	26	20	19	20	19.4526	14	19	16	16	15	13	21	20	19	22	26.9263	22	27	23	31	22
23.8444	24.8444	26.8444	27.8444	23.8444	20.8444	23.8444	22.8444	19.8444	22.8444	17.8444	18.8444	19.8444	20.8444	17.8444	20.8444	19.8444	19.8444	19.8444	19.8444	17.8718	16.8718	14.8718	17.8718	25.8718	20.8718	18.9718	18.8718	18.8718	21.8718	17.8718	18.8718	16.8718	22.936	18.4833	14.4833	14.4833	16.4833	16.4833	16.4833	19.4833	15.4833	14.4833	20.4833	21.4096	20.4833	24.4833	23.4833	23.4833	22.4833
37	36	37	40	35	35	35	34	32	32	25	27	25	32	22	21	22	28	23	26	22	27	25	27	29	29	25.1	23	27	23	27	26	23	38.4526	33	26	27	31	30	34	28	27	26	29	21.9263	29	34	36	28	31
33	32	29	32	31	31	29	32	28	26	25	23	23	28	26	27	28	28	25	28	24	23	23	23	25	25	23.1	23	27	23	23	22	25	32.4526	29	22	23	25	24	28	26	23	24	27	25.9263	25	26	28	26	27
37	38	39	38	35	35	37	32	30	36	33	31	31	30	36	39	36	32	33	38	36	31	29	31	35	31	36.1	35	33	33	31	32	31	27.4526	27	32	29	23	22	20	26	27	28	25	34.9263	29	26	28	36	29
32	33	32	31	30	30	28	27	23	27	24	22	18	25	23	22	23	23	22	25	21	20	16	20	32	28	22.1	22	22	20	20	19	20	30.4526	24	19	22	22	23	25	31	26	23	26	22.9263	26	27	31	27	30
29	30	29	30	27	27	25	30	24	26	19	23	23	24	20	19	24	22	25	26	20	21	17	21	25	27	20.1	19	21	21	21	20	19	24.4526	19	16	17	19	16	22	24	17	18	23	22.9263	23	26	28	30	27
28	27	32	33	28	24	30	27	23	29	22	22	26	27	25	26	27	27	26	31	25	22	24	22	26	20	25.1	24	26	26	24	23	26	27.4526	24	21	20	20	19	21	19	16	17	20	27.9263	20	21	19	25	22
35	40	39	40	37	35	35	38	30	36	29	31	35	32	34	33	34	34	35	38	32	33	29	33	31	31	27.6056	31	33	33	31	32	29	30.4421	27	26	27	23	24	26	26	23	24	27	32.6772	31	30	32	34	29
28	33	30	31	30	26	32	33	25	31	26	24	28	25	29	30	29	29	28	33	25	22	24	18	28	22	25.6056	24	26	30	22	21	24	25.4421	24	23	24	20	19	21	23	24	23	22	34.6772	26	27	29	29	28
26	27	30	31	26	22	24	29	23	29	20	20	26	23	19	20	21	21	24	25	21	22	18	22	24	22	20.6056	22	22	26	24	23	22	23.4421	18	17	16	16	15	19	19	14	15	22	27.6772	22	25	25	29	24
34	33	34	35	32	30	32	29	31	31	30	28	30	25	31	30	31	29	30	33	29	26	26	30	32	28	31.6056	30	30	30	26	27	26	23.4421	20	27	26	22	27	23	29	22	25	22	28.6772	26	29	25	31	26
30	31	32	33	28	26	32	27	27	31	28	24	28	23	29	32	29	27	26	31	29	24	24	26	28	24	28.6056	28	28	30	24	25	26	21.4421	20	25	22	20	19	17	23	22	23	22	31.6772	28	27	29	33	26
35	36	35	36	33	33	31	36	32	34	27	29	31	30	26	25	30	28	31	34	28	29	25	29	27	29	26.6056	27	29	27	29	28	25	28.4421	23	20	19	23	22	26	24	15	16	23	23.6772	27	28	28	32	29
30	35	36	37	32	30	36	35	31	37	30	28	32	29	33	34	33	31	30	37	33	28	28	30	32	26	31.6056	30	32	34	28	29	30	25.4421	24	25	24	18	25	23	23	20	21	24	34.6772	26	29	27	31	26
31	32	31	32	29	27	27	30	28	30	23	23	25	24	22	23	26	26	23	30	24	25	23	23	27	25	25.6056	23	27	25	23	22	21	20.4421	17	18	15	17	18	20	22	15	16	21	28.6772	25	24	28	28	25
34	37	36	37	34	30	36	35	29	33	30	26	28	27	31	32	31	29	28	33	29	26	26	28	30	28	31.6056	30	28	34	24	29	24	23.4421	20	27	26	24	25	25	29	22	25	26	30.6772	28	31	27	33	28
29	28	33	34	29	29	31	28	32	34	27	25	29	26	26	29	28	26	25	32	28	29	27	29	33	27	30.6056	29	31	31	29	28	27	26.4421	23	22	21	21	22	20	24	23	22	25	37.6772	27	28	28	32	27
35	36	37	38	33	29	37	34	30	38	31	29	33	30	30	31	32	30	31	36	32	25	27	29	31	27	30.6056	31	31	35	27	30	31	24.4421	21	24	21	21	24	24	26	19	22	27	29.6772	27	30	28	34	29
33	30	35	34	29	29	31	28	26	28	27	27	27	24	28	33	28	26	27	28	28	29	25	29	37	31	29.6056	29	29	29	27	28	25	21.4421	19	24	21	19	22	18	30	23	22	23	28.6772	31	30	32	34	29
41	40	41	42	39	39	39	38	38	40	39	37	41	34	38	41	38	38	37	40	36	37	35	39	41	39	35.6056	37	39	39	35	36	35	26.4421	25	28	29	27	26	24	34	33	34	33	40.6772	39	38	40	42	37
31	34	31	32	29	29	31	34	32	32	31	29	31	26	34	35	34	32	31	34	28	27	27	27	33	31	27.6056	27	31	31	25	24	27	24.4421	17	28	27	17	18	20	28	29	30	21	36.6772	27	28	30	32	29
39	40	41	40	37	35	39	36	30	38	33	33	33	34	32	37	32	30	33	32	30	29	27	35	39	35	33.6056	33	31	33	31	32	31	19.4421	19	24	21	23	20	22	34	29	30	29	30.6772	31	30	38	38	31
[truncated: 102 more columns]

## Sheet: Foglio1
171	151	10	20	13	20	14	13	20	18	8	10	15	3	53	73	25
			MCA	MCB	TO	FagA	FagB	CUS	GRAF	SC	RIV1	RIV2
Sample No-1	Pop	Locus 1	Locus 2	Locus 3	Locus 4	Locus 5	Locus 6	Locus 7	Locus 8	Locus 9	Locus 10	Locus 11	Locus 12	Locus 13	Locus 14	Locus 15	Locus 16	Locus 17	Locus 18	Locus 19	Locus 20	Locus 21	Locus 22	Locus 23	Locus 24	Locus 25	Locus 26	Locus 27	Locus 28	Locus 29	Locus 30	Locus 31	Locus 32	Locus 33	Locus 34	Locus 35	Locus 36	Locus 37	Locus 38	Locus 39	Locus 40	Locus 41	Locus 42	Locus 43	Locus 44	Locus 45	Locus 46	Locus 47	Locus 48
MCA_1	Pop MCA	0	0	0	1	0	0	0	0	0	0	1	1	0	1	0	1	0	1	0	0	0	0	0	1	1	0	0	1	0	0	0	1	0	0	0	1	0	0	1	0	0	1	0	1	1	1	0	0
MCA_2	Pop MCA	0	0	0	1	0	0	0	0	0	0	1	1	0	1	0	1	0	1	0	0	0	0	0	0	1	0	0	1	0	0	0	0	0	0	0	1	0	0	0	0	0	0	0	1	1	1	0	0
MCA_3	Pop MCA	1	0	0	1	0	0	0	0	0	0	1	1	0	0	0	1	0	1	0	0	0	0	0	0	1	0	1	1	0	0	0	1	0	0	0	1	0	0	1	0	0	1	0	1	1	1	0	0
MCA_4	Pop MCA	1	0	0	1	0	0	0	0	0	0	1	1	0	0	0	1	0	1	0	0	1	0	0	1	1	0	1	0	0	0	0	0	0	0	0	1	0	0	1	0	0	1	0	1	1	1	0	0
MCA_5	Pop MCA	0	0	0	1	0	0	0	0	0	0	1	1	0	1	0	1	0	1	0	0	0	0	0	0	1	0	0	1	0	0	0	1	0	0	0	1	0	0	1	0	0	1	0	1	1	1	0	0
MCA_6	Pop MCA	0	0	0	1	0	0	0	0	0	0	1	1	0	1	0	1	0	1	0	0	0	0	0	0	1	0	0	1	0	0	0	0	0	0	0	1	0	0	1	0	0	1	0	1	1	1	0	0
MCA_7	Pop MCA	0	0	0	1	0	0	0	0	0	0	1	1	0	0	0	1	0	1	0	0	0	0	0	0	1	0	0	1	0	0	0	0	0	0	0	1	0	0	1	0	0	1	0	1	1	1	0	0
MCA_8	Pop MCA	0	0	0	1	0	0	0	0	0	0	1	1	0	1	0	1	0	1	0	0	0	0	0	0	1	0	0	0	0	0	0	0	0	0	0	1	1	0	1	0	0	1	1	1	1	1	0	0
MCA_9	Pop MCA	0	0	0	1	0	0	0	0	0	0	1	1	0	1	0	1	0	1	0	0	0	0	0	0	1	0	0	0	0	0	0	0	0	0	0	1	1	0	1	0	0	1	1	1	1	1	0	0
MCA_10	Pop MCA	0	0	0	0	0	0	0	0	0	0	1	1	0	0	0	1	0	1	0	0	0	0	0	0	1	0	0	1	0	0	0	0	0	0	0	1	1	0	0	0	0	0	0	1	1	1	0	0
MCA_11	Pop MCA	0	0	0	1	0	0	0	0	0	0	1	1	0	1	0	1	0	1	0	0	0	0	0	0	1	0	0	1	0	0	0	0	0	0	0	1	0	0	0	0	0	1	0	1	1	1	0	0
MCA_12	Pop MCA	0	0	0	1	0	0	0	0	0	0	1	1	0	1	0	1	0	1	0	0	0	0	0	0	1	0	0	1	0	0	0	0	0	0	0	1	1	0	0	0	0	1	0	1	1	1	0	0
MCA_13	Pop MCA	0	0	0	0	0	0	0	0	0	0	1	1	0	1	0	1	0	1	0	0	0	0	0	0	1	0	0	0	0	0	0	0	0	0	0	1	0	0	0	0	0	1	0	1	1	1	0	0
MCA_14	Pop MCA	0	0	0	1	0	0	0	0	0	0	1	1	0	0	0	1	0	1	0	0	1	0	0	0	1	0	0	1	0	0	0	0	0	0	0	1	1	0	1	0	0	1	0	1	1	1	0	0
MCA_15	Pop MCA	0	0	0	1	0	0	0	0	0	0	0	1	0	1	0	1	0	1	0	0	0	0	0	0	1	0	0	1	0	0	0	0	0	0	0	1	1	0	0	0	0	1	0	1	1	1	0	0
MCA_16	Pop MCA	0	0	0	1	0	0	0	0	0	0	0	1	0	0	0	1	0	1	0	0	0	0	0	0	1	0	0	1	0	0	0	0	0	0	0	0	0	0	0	0	0	1	0	1	1	1	0	0
MCA_17	Pop MCA	0	0	0	1	0	0	0	0	0	0	0	1	0	1	0	1	0	1	0	0	0	0	0	0	1	0	0	1	0	0	0	0	0	0	0	1	1	0	0	0	0	1	0	1	1	1	0	0
MCA_18	Pop MCA	0	0	0	1	0	0	0	0	0	0	1	1	0	1	0	1	0	1	0	0	0	0	0	0	1	0	0	0	0	0	0	0	0	0	0	1	0	0	0	0	0	0	0	1	1	1	0	0
MCA_19	Pop MCA	0	0	0	1	0	0	0	0	0	0	1	1	0	1	0	1	0	1	0	0	0	0	0	0	1	1	0	1	0	0	0	0	0	0	0	0	1	0	0	0	0	1	0	1	1	1	0	0
MCA_20	Pop MCA	0	0	0	1	0	0	0	0	0	0	1	1	0	1	0	1	0	1	0	0	1	0	0	0	1	0	0	1	0	0	0	0	0	0	0	0	1	0	0	0	0	1	0	1	1	1	0	0
MCB_1	Pop MCB	0	0	0	1	0	1	0	0	0	0	1	1	0	0	0	1	0	1	0	0	0	0	0	0	1	0	0	1	0	0	0	0	0	0	0	0	1	0	0	0	0	1	0	1	1	1	0	0
MCB_2	Pop MCB	0	0	0	0	1	1	0	0	0	0	1	1	0	1	0	1	0	1	0	0	0	0	0	0	1	0	0	1	0	0	0	0	0	0	0	0	1	0	1	0	0	1	0	1	1	1	0	0
MCB_3	Pop MCB	0	0	0	1	0	1	0	0	0	0	1	1	0	1	0	1	0	1	0	0	1	0	0	0	1	0	0	1	0	0	0	0	0	0	0	0	1	0	1	0	0	1	0	1	1	1	0	0
MCB_4	Pop MCB	1	0	0	1	0	1	0	0	0	0	1	1	0	0	0	1	0	1	0	0	0	0	0	0	1	0	0	1	0	0	0	0	0	0	0	0	1	0	1	0	0	1	1	1	1	1	0	0
MCB_5	Pop MCB	1	0	0	1	0	1	0	0	0	0	1	1	0	0	0	1	0	1	0	0	0	0	0	0	1	0	0	1	0	0	1	1	0	0	0	0	0	0	1	0	0	1	0	1	1	1	0	0
MCB_6	Pop MCB	1	0	0	1	0	1	0	0	0	0	1	1	0	1	0	1	0	1	0	0	0	0	0	0	1	0	0	1	0	0	0	0	0	0	0	0	0	0	1	0	0	1	0	1	1	1	0	0
MCB_7	Pop MCB	0	0	0	1	0	1	0	0	0	0	1	1	0	0	0	1	0	1	0	0	1	0	0	0	1	0	0	1	0	-1	-1	-1	-1	-1	-1	-1	-1	-1	-1	-1	-1	1	-1	1	1	1	0	0
MCB_8	Pop MCB	0	0	0	1	0	1	0	0	0	0	0	1	0	0	0	1	0	1	0	0	0	0	0	0	1	0	0	1	0	0	0	0	0	0	0	0	1	0	1	0	0	1	0	1	1	1	0	0
MCB_9	Pop MCB	0	0	0	1	0	1	0	0	0	0	0	1	0	1	0	1	0	1	0	0	0	0	0	0	1	0	0	1	0	0	0	1	0	0	0	0	0	0	1	0	0	1	0	1	1	1	0	0
MCB_10	Pop MCB	0	0	0	1	0	1	0	0	0	0	0	1	0	0	0	1	0	1	0	0	0	0	0	0	1	0	0	0	0	0	0	0	0	0	0	0	0	0	0	0	0	1	0	1	1	1	0	1
MCB_11	Pop MCB	0	0	0	1	0	1	0	0	0	0	1	1	0	0	0	1	0	1	0	0	0	0	0	0	1	0	0	1	0	0	0	1	0	0	0	0	1	0	1	0	0	1	0	1	1	1	0	0
MCB_12	Pop MCB	0	0	0	1	0	1	0	0	0	0	1	1	0	0	0	1	0	1	0	0	0	0	0	0	1	0	0	1	0	0	0	0	0	0	0	0	1	0	1	0	0	1	0	1	1	1	0	0
MCB_13	Pop MCB	0	0	0	1	0	0	0	0	0	0	1	1	0	0	0	1	0	1	0	0	0	0	0	0	1	0	0	1	0	0	0	0	0	0	0	0	1	0	1	0	0	1	0	1	1	1	0	0
TO_1	Pop TO	0	0	0	1	0	0	0	0	0	0	1	1	0	1	0	1	0	1	0	0	0	0	0	0	1	0	0	-1	1	0	0	0	0	0	0	0	1	0	1	0	0	1	0	1	1	1	0	0
TO_2	Pop TO	0	0	0	1	0	0	0	0	0	0	1	1	0	0	0	1	0	1	0	0	0	0	0	0	1	0	0	0	0	0	0	0	0	0	0	0	1	0	1	0	0	1	0	1	1	1	0	0
TO_3	Pop TO	0	0	1	0	0	0	0	0	0	0	1	1	0	0	0	1	0	1	0	0	0	0	0	0	1	0	0	0	0	0	0	0	0	0	0	0	1	0	0	0	0	1	0	1	1	1	0	0
TO_4	Pop TO	0	0	0	1	0	0	0	0	0	0	1	1	0	1	0	1	0	1	0	0	0	0	0	0	1	0	0	0	0	0	0	0	0	0	0	0	1	0	0	0	0	1	0	1	1	1	0	0
TO_5	Pop TO	0	0	0	1	0	0	0	0	0	0	1	1	0	1	0	1	0	1	0	0	0	0	0	0	1	0	0	0	0	0	0	0	0	0	0	0	1	0	1	0	0	1	0	1	1	1	0	0
TO_6	Pop TO	0	0	0	1	0	0	0	0	0	0	1	1	0	1	0	1	0	1	0	0	0	0	0	0	1	0	0	0	0	0	0	0	0	0	0	0	1	0	1	0	0	1	0	1	1	1	0	0
TO_7	Pop TO	0	0	0	1	0	0	0	0	0	0	1	1	0	1	0	1	0	1	0	0	0	0	1	0	1	0	0	0	0	0	0	0	0	0	0	0	1	0	1	0	0	1	0	1	1	1	0	0
TO_8	Pop TO	0	0	0	1	0	0	0	0	0	0	1	1	0	1	0	1	0	1	0	0	0	0	1	0	1	0	0	1	0	0	0	0	0	0	0	0	1	0	1	0	0	1	0	1	1	1	0	0
TO_9	Pop TO	0	0	0	1	0	0	0	0	0	0	1	1	0	1	0	1	0	1	0	0	0	0	0	0	1	0	0	1	0	0	0	0	0	0	0	0	1	0	1	0	0	1	0	1	1	1	0	0
TO_10	Pop TO	0	0	0	1	0	0	0	0	0	0	1	1	0	1	0	1	0	1	0	0	0	0	0	0	1	0	0	1	0	0	0	0	0	0	0	0	1	0	1	0	0	1	0	1	1	1	0	0
TO_11	Pop TO	0	0	0	1	0	0	0	0	0	0	1	1	0	1	0	1	0	1	0	0	0	0	0	0	1	0	0	1	0	0	0	0	0	0	0	0	1	0	1	0	0	1	0	1	1	1	0	0
TO_12	Pop TO	0	0	1	1	0	0	0	0	0	0	1	1	0	1	0	1	0	1	0	0	0	0	0	0	1	0	0	0	0	-1	-1	-1	-1	-1	-1	-1	1	-1	-1	-1	-1	-1	-1	1	1	1	0	0
TO_13	Pop TO	0	0	0	0	0	0	0	0	0	0	1	1	0	1	0	1	0	1	0	0	0	0	0	0	1	0	0	1	0	0	0	0	0	0	0	0	1	0	0	0	0	0	0	1	1	1	0	0
TO_14	Pop TO	0	0	0	1	0	0	0	0	0	0	1	1	0	1	0	1	0	1	0	0	0	0	0	0	1	0	0	0	0	0	0	0	0	0	0	0	1	0	0	0	0	0	0	1	1	1	0	0
TO_15	Pop TO	0	0	0	1	0	0	0	0	0	0	1	1	0	1	0	1	0	1	0	0	0	0	0	0	1	0	0	1	0	0	0	0	0	0	0	0	1	0	0	0	0	0	0	1	1	1	0	0
TO_16	Pop TO	0	0	1	0	0	0	0	0	0	0	1	1	0	0	0	1	0	1	0	0	0	0	0	0	1	0	0	1	0	0	0	0	0	0	0	0	0	0	0	0	0	0	0	1	1	1	0	0
TO_17	Pop TO	0	0	0	1	0	0	0	0	0	0	1	1	0	1	0	1	0	1	0	0	0	0	0	0	1	0	0	1	1	0	0	0	0	0	0	0	1	0	0	0	0	0	0	1	1	1	0	0
TO_18	Pop TO	0	0	0	1	0	0	0	0	0	0	1	1	0	1	0	1	0	1	0	0	0	0	0	0	1	0	0	1	1	0	0	0	0	0	0	0	1	0	0	0	0	0	0	1	1	1	0	0
TO_19	Pop TO	0	0	0	1	0	0	0	0	0	0	1	1	0	1	0	1	0	1	0	0	0	0	0	0	1	0	0	1	1	0	0	0	0	0	0	0	1	0	0	0	0	0	0	1	1	1	0	0
TO_20	Pop TO	0	0	0	1	0	0	0	0	0	0	1	1	0	1	0	1	0	1	0	0	0	0	0	0	1	0	0	1	1	0	0	0	0	0	0	0	1	0	0	0	0	0	0	1	1	1	0	0
FagA_1	Pop FagA	0	0	0	1	0	0	0	0	0	0	1	1	0	0	0	1	0	1	0	0	0	0	0	0	1	0	0	1	0	0	0	0	0	0	0	0	1	0	1	0	0	1	0	1	1	1	0	0
FagA_2	Pop FagA	0	0	0	1	0	0	0	0	0	0	1	1	0	1	0	1	0	1	0	0	0	0	0	0	1	0	0	1	0	0	0	0	0	0	0	1	1	0	1	1	0	1	0	1	1	1	0	0
FagA_3	Pop FagA	0	0	0	1	0	0	0	0	0	0	1	1	0	1	0	1	0	1	0	0	0	0	0	0	1	0	0	1	0	0	0	0	0	0	0	0	1	0	1	0	0	1	0	1	1	1	0	0
FagA_4	Pop FagA	1	0	0	1	0	0	0	0	0	0	1	1	0	1	0	1	0	1	0	0	0	0	0	0	1	0	0	1	0	0	0	0	0	0	0	1	1	0	1	0	1	1	0	1	1	1	0	0
FagA_5	Pop FagA	0	0	0	1	0	0	0	0	0	0	1	1	0	1	0	1	0	1	0	0	0	0	0	0	1	0	0	1	0	0	0	0	0	0	0	1	1	0	1	1	1	1	0	1	1	1	0	0
FagA_6	Pop FagA	1	0	0	1	0	0	0	0	0	0	1	1	0	0	0	1	0	1	0	0	0	0	0	0	1	0	0	1	0	0	0	0	0	0	0	0	1	0	1	0	1	1	0	1	1	1	0	0
FagA_7	Pop FagA	0	0	0	1	0	0	1	0	0	0	1	1	0	0	0	1	0	1	0	0	0	0	0	0	1	0	0	1	0	0	0	0	0	0	1	0	1	0	1	0	0	1	0	1	1	1	0	0
FagA_8	Pop FagA	1	0	0	1	0	0	0	0	0	0	1	1	0	0	0	1	0	1	0	0	0	0	0	0	1	0	0	1	0	0	0	0	0	0	0	0	1	0	1	0	1	1	0	1	1	1	0	0
FagA_9	Pop FagA	0	0	1	0	0	0	0	0	0	0	1	1	0	1	0	1	0	1	0	0	0	0	0	0	1	0	0	1	0	0	0	0	0	0	0	0	0	0	0	0	0	1	0	1	1	1	0	0
FagA_10	Pop FagA	0	0	1	0	0	0	0	0	0	0	1	1	0	0	0	1	0	1	0	0	0	0	0	0	1	0	0	1	0	0	0	0	0	0	0	0	1	0	0	1	0	1	0	1	1	1	0	0
FagA_11	Pop FagA	0	0	0	0	1	0	1	0	0	0	1	1	0	0	0	1	0	1	0	0	0	0	0	0	1	0	0	1	0	0	0	0	0	0	1	1	1	0	1	1	0	1	0	1	1	1	0	0
FagA_12	Pop FagA	0	0	0	1	0	0	0	0	0	0	0	1	0	1	0	1	0	1	0	0	0	0	0	0	1	0	0	1	0	0	0	0	0	0	1	0	1	0	1	1	0	1	0	1	1	1	0	0
FagA_13	Pop FagA	0	0	0	1	0	0	0	0	0	0	1	1	0	1	0	1	0	1	0	0	0	0	0	0	1	0	0	1	0	0	0	0	0	0	1	0	1	0	1	0	1	1	0	1	1	1	0	0
FagA_14	Pop FagA	0	0	0	1	0	0	0	0	0	0	1	1	0	1	0	1	0	1	0	0	0	0	0	0	1	0	0	1	0	0	0	0	0	0	0	1	1	0	1	0	0	1	0	1	1	1	0	0
Fag_B_1	Pop FagB	0	0	0	1	0	0	0	0	0	0	1	1	0	0	0	1	0	1	0	0	0	0	0	0	1	0	0	1	0	0	0	0	0	0	0	1	1	0	0	1	0	1	0	1	1	1	0	0
Fag_B_2	Pop FagB	0	0	0	1	0	0	0	0	0	0	1	1	0	1	0	1	0	1	0	0	0	0	0	0	1	0	0	1	0	1	0	0	0	0	0	1	1	0	1	0	0	1	0	1	1	1	0	0
Fag_B_3	Pop FagB	0	0	1	0	0	0	0	0	0	0	0	1	0	0	0	1	0	1	0	0	0	0	0	0	1	0	0	1	0	0	0	0	0	0	0	0	1	0	1	0	0	1	0	1	1	1	0	0
Fag_B_4	Pop FagB	0	0	0	1	0	0	0	0	0	0	1	1	0	0	0	1	0	1	0	0	0	0	0	0	1	0	0	1	0	0	0	0	0	0	0	1	1	0	1	0	0	1	0	1	1	1	0	0
Fag_B_5	Pop FagB	0	0	0	1	0	0	0	0	0	0	1	1	0	1	0	1	0	1	0	0	0	0	0	0	1	0	0	1	0	0	0	0	0	0	0	0	1	0	0	1	0	1	0	1	1	1	0	0
Fag_B_6	Pop FagB	0	0	0	1	0	0	0	0	0	0	1	1	0	1	0	1	0	1	0	0	0	0	0	0	1	0	0	1	0	0	0	0	0	0	1	1	1	0	1	0	0	1	0	1	1	1	0	0
Fag_B_7	Pop FagB	0	0	0	1	0	0	0	0	0	0	1	1	0	1	0	1	0	1	0	0	0	0	0	0	1	0	0	1	0	0	0	0	0	0	0	1	1	0	1	1	0	1	0	1	1	1	0	0
Fag_B_8	Pop FagB	0	0	0	1	0	0	1	0	0	0	1	1	0	1	0	1	0	1	0	0	0	0	0	0	1	0	0	1	0	0	0	0	0	0	0	1	1	0	1	1	0	1	0	1	1	1	0	0
Fag_B_9	Pop FagB	0	0	0	1	0	0	0	0	0	0	0	1	0	1	0	1	0	1	0	0	0	0	0	0	1	0	0	1	0	0	0	0	0	0	0	1	1	0	0	0	0	1	0	1	1	1	0	0
Fag_B_10	Pop FagB	1	0	0	1	0	0	0	0	0	0	1	1	0	1	0	1	0	1	0	0	0	0	0	0	1	0	0	1	0	0	0	0	0	0	0	1	1	0	1	1	0	1	0	1	1	1	0	0
Fag_B_11	Pop FagB	0	0	0	1	0	0	0	0	0	0	1	1	0	0	0	1	0	1	0	0	0	0	0	0	1	0	0	1	0	0	0	0	0	0	0	0	1	0	0	0	0	1	0	1	1	1	0	0
Fag_B_12	Pop FagB	0	0	0	1	0	0	1	0	0	0	1	1	0	0	0	1	0	1	0	0	0	0	0	0	1	0	0	0	0	0	0	0	0	0	0	0	1	0	1	0	0	1	0	1	1	1	0	0
Fag_B_13	Pop FagB	1	0	0	1	0	0	0	0	0	0	1	1	0	0	0	1	0	1	0	0	0	0	0	0	1	0	0	0	0	0	0	0	0	0	0	1	1	0	1	1	0	1	0	1	1	1	0	0
CUS_1	Pop CUS	0	0	0	1	0	0	0	0	0	0	1	1	0	1	0	1	0	1	0	0	0	0	0	0	1	0	0	1	1	0	0	0	0	0	0	0	1	0	0	0	0	1	0	1	1	1	0	0
CUS_2	Pop CUS	0	0	0	1	0	0	0	0	1	0	0	1	0	1	0	1	0	1	0	0	0	0	0	0	1	0	0	0	0	0	0	0	0	0	0	0	0	0	0	0	0	1	0	1	1	1	0	0
CUS_3	Pop CUS	0	0	0	1	0	0	0	0	0	0	1	1	0	1	0	1	0	1	0	0	0	0	0	0	1	0	0	1	0	0	0	0	0	0	0	0	1	0	0	0	0	1	0	1	1	1	0	0
CUS_4	Pop CUS	0	0	1	0	0	0	0	0	0	0	1	1	0	0	0	1	0	1	0	0	0	0	0	0	1	0	0	1	0	0	0	0	0	0	0	0	1	0	0	0	0	1	0	1	1	1	0	0
CUS_5	Pop CUS	0	0	0	1	0	0	0	0	0	0	1	1	0	1	0	1	0	1	0	0	0	0	0	0	1	0	0	1	0	-1	-1	-1	-1	-1	-1	-1	1	-1	-1	-1	-1	1	-1	1	1	1	0	0
CUS_6	Pop CUS	0	0	0	1	0	0	0	0	0	0	1	1	0	0	0	1	0	1	0	0	0	0	0	0	1	0	0	1	0	0	0	0	0	0	0	0	1	0	0	0	0	1	0	1	1	1	0	0
CUS_7	Pop CUS	0	0	1	0	0	0	0	0	0	0	1	1	0	0	0	1	0	1	0	0	0	0	0	0	1	0	0	0	0	0	0	0	0	0	0	0	1	0	0	0	0	1	0	1	1	1	0	0
CUS_8	Pop CUS	0	0	1	0	0	0	0	0	0	0	1	1	0	0	0	1	0	1	0	0	0	0	0	0	1	0	0	0	0	-1	-1	-1	-1	-1	-1	-1	1	-1	-1	-1	-1	1	-1	1	1	1	0	0
CUS_9	Pop CUS	0	0	0	1	0	0	0	0	0	0	1	1	0	1	0	1	0	1	0	0	0	0	0	0	1	0	0	1	1	0	0	0	0	0	0	0	1	0	0	0	0	0	0	1	1	1	0	0
CUS_10	Pop CUS	0	0	0	1	0	0	0	0	0	0	1	1	0	1	0	1	0	1	0	0	0	0	0	0	1	0	0	1	0	0	0	0	0	0	0	0	1	0	0	0	0	0	0	1	1	1	0	0
CUS_11	Pop CUS	0	0	0	1	0	0	0	0	0	0	1	1	0	0	0	1	0	1	0	0	0	0	0	0	1	0	0	1	0	0	0	0	0	0	0	0	1	0	0	0	0	0	0	1	1	1	0	0
CUS_12	Pop CUS	0	0	0	1	0	0	0	0	0	0	1	1	0	0	0	1	0	1	0	0	0	0	0	0	1	0	0	0	0	0	0	0	0	0	0	0	1	0	0	0	0	1	0	1	1	1	0	0
CUS_13	Pop CUS	0	0	0	1	0	0	0	0	0	0	1	1	0	1	0	1	0	1	0	0	0	0	0	0	1	0	0	1	0	0	0	0	0	0	0	0	1	0	0	0	0	0	0	1	1	1	0	0
CUS_14	Pop CUS	0	0	0	1	0	0	0	0	0	0	1	1	0	1	0	1	0	1	0	0	0	0	0	0	1	0	0	1	0	0	0	0	0	0	0	0	1	0	0	0	0	0	0	1	1	1	0	0
CUS_15	Pop CUS	0	0	0	1	0	0	0	0	0	0	1	1	0	1	0	1	0	1	0	0	0	0	0	0	1	0	0	1	0	0	0	0	0	0	0	0	1	0	0	0	0	0	0	1	1	1	0	0
CUS_16	Pop CUS	0	0	0	1	0	0	0	0	0	0	1	1	0	0	0	1	0	1	0	0	0	0	0	0	1	0	0	0	0	0	0	0	0	0	0	0	1	0	0	0	0	1	0	1	1	1	0	0
CUS_17	Pop CUS	0	0	0	1	0	0	0	0	0	0	1	1	0	0	0	1	0	1	0	0	0	0	0	0	1	0	0	0	1	0	0	0	0	0	0	0	1	0	0	0	0	1	0	1	1	1	0	0
CUS_18	Pop CUS	0	0	0	1	0	0	0	0	0	0	1	1	0	0	0	1	0	1	0	0	0	0	0	0	1	0	0	0	1	0	0	0	0	0	0	0	1	0	0	0	0	1	0	1	1	1	0	0
CUS_19	Pop CUS	0	0	0	1	0	0	0	0	0	0	1	1	0	1	0	1	0	1	0	0	0	0	0	0	1	0	0	0	0	0	0	0	0	0	0	0	0	0	0	0	0	1	0	1	1	1	0	0
CUS_20	Pop CUS	0	0	0	1	0	0	0	0	0	0	1	1	0	0	0	1	0	1	0	0	0	0	0	0	1	0	0	0	1	0	0	0	0	0	0	0	0	0	0	0	0	1	0	1	1	1	0	0
GRAF_1	Pop GRAF	0	0	0	1	0	0	0	0	0	0	1	1	0	1	0	1	0	1	0	0	0	0	0	0	1	0	0	0	1	0	0	0	0	0	0	0	1	0	0	0	0	0	0	1	1	1	0	0
GRAF_2	Pop GRAF	0	0	0	1	0	0	0	0	0	0	1	1	0	1	0	1	0	1	0	0	1	0	0	0	1	0	0	0	0	0	0	0	0	0	0	0	1	0	0	0	0	1	0	1	1	1	0	0
GRAF_3	Pop GRAF	0	0	0	1	0	0	0	0	0	0	1	1	0	1	0	1	0	1	0	0	0	0	0	0	1	0	0	0	1	0	0	0	0	0	0	0	1	0	0	0	0	1	0	1	1	1	0	0
GRAF_4	Pop GRAF	0	0	0	1	0	0	0	0	0	0	1	1	0	0	0	1	0	1	0	0	0	0	0	0	1	0	0	1	0	0	0	0	0	0	0	0	1	0	0	0	0	1	0	1	1	1	0	0
GRAF_5	Pop GRAF	0	0	1	0	0	0	0	0	0	0	1	1	0	0	0	1	0	1	0	0	0	0	0	0	1	0	0	1	0	0	0	0	0	0	0	0	1	0	0	0	0	1	0	1	1	1	0	1
GRAF_6	Pop GRAF	0	0	0	1	0	0	0	0	0	0	1	1	0	0	0	1	0	1	0	0	0	0	0	0	1	0	0	0	0	0	0	0	0	0	0	0	1	0	0	0	0	1	0	1	1	1	0	0
GRAF_7	Pop GRAF	0	0	0	1	0	0	0	0	0	0	1	1	0	0	0	1	0	1	0	0	0	0	0	0	1	0	0	0	0	0	0	0	0	0	0	0	0	0	0	0	0	1	0	1	1	1	0	0
GRAF_8	Pop GRAF	0	0	0	1	0	0	0	0	0	0	1	1	0	0	0	1	0	1	0	0	1	0	0	0	1	0	0	1	0	0	0	0	0	0	0	0	0	0	0	0	0	1	0	1	1	1	0	0
GRAF_9	Pop GRAF	0	0	0	1	0	0	0	0	0	0	1	1	0	0	0	1	0	1	0	0	0	0	0	0	1	0	0	0	0	0	0	0	0	0	0	0	0	0	0	0	0	1	0	1	1	1	0	0
GRAF_10	Pop GRAF	0	0	0	1	0	0	0	0	0	0	1	1	0	0	0	1	0	1	0	0	0	0	0	0	1	0	0	0	0	0	0	0	0	0	0	0	0	0	0	0	0	1	0	1	1	1	0	0
GRAF_11	Pop GRAF	0	0	0	1	0	0	0	0	0	0	1	1	0	0	0	1	0	1	0	0	0	0	0	0	1	0	0	0	0	0	0	0	0	0	0	0	0	0	0	0	0	1	0	1	1	1	0	0
GRAF_12	Pop GRAF	0	0	1	0	0	0	0	0	0	0	1	1	0	0	0	1	0	1	0	0	0	0	0	0	1	0	0	0	0	-1	-1	-1	-1	-1	-1	-1	1	-1	-1	-1	-1	-1	-1	1	1	1	0	0
GRAF_13	Pop GRAF	0	0	0	1	0	0	0	0	0	0	1	1	0	1	0	1	0	1	1	0	1	0	0	0	1	0	0	1	0	0	0	0	0	0	0	0	1	0	0	0	0	0	0	1	1	0	1	0
GRAF_14	Pop GRAF	0	0	0	1	0	0	0	0	0	0	1	1	0	1	0	1	0	1	0	0	0	0	0	0	1	0	0	0	0	0	0	0	0	0	0	0	1	0	0	0	0	0	0	1	1	1	0	0
GRAF_15	Pop GRAF	0	0	0	1	0	0	0	0	0	0	1	1	0	1	0	1	0	1	0	0	0	0	0	0	1	0	0	1	0	0	0	0	0	0	0	0	1	0	0	0	0	0	0	1	1	1	0	0
GRAF_16	Pop GRAF	0	0	0	1	0	0	0	0	0	0	1	1	0	1	0	1	0	1	0	0	0	0	0	0	1	0	0	0	0	0	0	0	0	0	0	0	1	0	0	0	0	0	0	1	1	1	0	0
GRAF_17	Pop GRAF	0	0	0	1	0	0	0	0	0	0	1	1	0	1	0	1	0	1	0	0	0	0	0	1	1	0	0	0	0	-1	-1	-1	-1	-1	-1	-1	1	-1	-1	-1	-1	-1	-1	1	1	1	0	0
GRAF_18	Pop GRAF	0	0	0	1	0	0	0	0	0	0	1	1	0	1	0	1	0	1	0	0	0	0	0	1	1	0	0	1	0	0	0	1	0	0	1	0	1	0	0	0	0	0	0	1	1	0	1	0
SC_1	Pop SC	1	0	0	1	0	0	0	1	0	0	1	1	0	1	0	1	0	1	0	0	1	0	0	1	1	0	0	0	0	0	0	0	0	0	0	0	1	0	0	0	0	0	0	1	1	1	0	0
SC_2	Pop SC	0	0	0	1	0	0	0	1	0	0	1	1	0	0	1	1	0	1	0	0	0	0	0	0	1	0	0	0	0	0	0	0	0	0	0	0	1	0	0	0	0	1	0	1	1	0	1	0
SC_3	Pop SC	0	0	0	1	0	0	0	1	0	0	1	1	0	0	0	1	0	1	0	0	0	0	0	0	1	0	0	0	0	0	0	0	0	0	0	0	1	0	1	1	0	1	1	1	1	1	0	0
SC_4	Pop SC	0	0	0	1	0	0	0	1	0	0	1	1	0	0	0	1	0	1	0	0	0	0	0	0	1	0	0	0	0	0	0	0	0	0	0	0	1	0	1	1	1	1	1	1	1	0	1	0
SC_5	Pop SC	1	0	0	1	0	0	0	1	0	0	1	1	0	0	0	1	0	1	1	0	1	1	0	1	1	0	0	1	0	0	0	0	0	0	0	0	1	0	1	1	0	1	1	1	1	1	0	0
SC_6	Pop SC	1	0	1	1	0	0	0	1	0	0	1	1	0	1	0	1	0	1	1	0	1	0	0	1	1	0	0	0	0	0	0	0	0	0	0	0	1	0	1	1	0	1	1	1	1	0	1	0
SC_7	Pop SC	1	0	0	1	0	0	0	1	0	0	1	1	0	0	0	1	0	1	0	0	0	1	0	1	1	0	0	1	0	0	0	0	0	0	0	0	1	0	1	1	1	1	1	1	1	0	1	0
SC_8	Pop SC	1	1	0	1	0	0	1	1	0	0	1	1	0	0	0	1	0	1	0	0	0	1	0	1	1	0	0	1	0	0	0	0	0	0	0	0	1	0	1	1	1	1	0	1	1	0	1	0
RIV1_1	Pop RIV1	1	0	0	1	0	0	0	0	0	0	1	1	0	1	0	1	0	1	0	0	0	0	0	0	1	0	0	1	0	0	1	0	1	1	1	1	1	1	1	0	0	1	0	1	1	1	0	0
RIV1_2	Pop RIV1	0	0	0	1	0	0	0	0	0	0	0	1	0	0	0	1	1	1	0	0	0	0	0	0	1	0	0	1	0	0	0	0	0	0	0	0	1	0	0	0	0	1	0	1	1	1	0	0
RIV1_3	Pop RIV1	0	0	0	1	0	0	0	0	0	0	1	1	0	1	0	1	0	1	0	0	0	0	0	0	1	0	0	1	0	0	0	0	0	0	0	0	1	0	1	0	0	1	0	1	1	1	0	0
RIV1_4	Pop RIV1	0	0	1	0	0	0	0	0	0	0	1	1	0	1	0	1	0	1	0	0	0	0	0	0	1	0	0	1	0	0	0	0	0	0	0	0	1	0	1	0	0	1	0	1	1	1	0	0
RIV1_5	Pop RIV1	0	0	1	0	0	0	0	0	0	0	0	1	0	0	0	1	0	1	0	0	0	0	0	0	1	0	0	1	0	0	1	0	0	0	0	0	1	0	0	0	0	1	0	1	1	1	0	0
RIV1_6	Pop RIV1	0	0	1	0	0	0	0	0	0	0	1	1	0	0	0	1	0	1	0	0	0	0	0	0	1	0	0	1	0	0	1	0	0	0	0	0	1	0	0	0	0	1	0	1	1	1	0	0
RIV1_7	Pop RIV1	0	0	0	1	0	0	0	0	0	0	1	1	0	1	0	1	0	1	0	0	0	0	0	0	1	0	0	0	0	0	1	0	0	0	0	0	1	0	1	0	0	1	0	1	1	0	1	0
RIV1_8	Pop RIV1	0	0	1	0	0	0	0	0	0	0	1	1	0	0	0	1	0	1	0	0	1	0	0	0	1	0	0	0	0	0	0	0	0	0	0	0	1	0	1	0	0	1	0	1	1	1	0	0
RIV1_9	Pop RIV1	0	0	0	1	0	0	0	0	0	0	1	1	1	0	0	1	0	1	0	0	0	0	0	0	1	0	0	1	0	0	1	0	0	0	0	0	1	0	1	0	0	1	0	1	1	1	0	0
RIV1_10	Pop RIV1	0	0	0	1	0	0	0	0	0	0	1	1	0	1	0	1	0	1	0	0	0	0	0	0	1	0	0	1	0	0	0	0	0	0	0	0	1	0	0	0	0	1	0	1	1	1	0	0
RIV2_1	Pop RIV2	0	0	0	1	0	0	0	0	0	0	1	1	0	0	0	1	0	1	0	0	0	0	0	0	1	0	0	1	0	1	1	0	1	0	0	0	1	0	1	0	1	1	0	1	1	0	1	0
RIV2_2	Pop RIV2	1	0	0	1	0	0	0	0	0	0	1	1	0	0	0	1	0	1	0	0	0	0	0	0	1	0	0	1	0	0	0	0	0	0	0	0	1	0	1	0	1	1	0	1	1	0	1	0
RIV2_3	Pop RIV2	0	0	0	1	0	0	0	0	0	0	1	1	0	1	0	1	0	1	0	1	0	0	0	0	1	0	0	1	0	0	0	0	0	0	0	0	1	0	1	0	0	1	0	1	1	1	0	0
RIV2_4	Pop RIV2	0	0	0	1	0	0	0	0	0	0	1	1	0	0	0	1	0	1	0	0	0	0	0	0	1	0	0	1	0	0	1	0	0	0	0	0	1	0	1	0	0	1	0	1	1	1	0	0
RIV2_5	Pop RIV2	0	0	0	1	0	0	0	0	0	1	1	1	0	1	0	1	0	1	0	0	0	0	0	0	1	0	0	1	0	0	1	0	0	0	0	0	1	0	1	1	0	1	0	1	1	1	0	0
RIV2_6	Pop RIV2	0	0	0	1	0	0	0	0	0	0	1	1	0	0	0	1	0	1	0	0	0	0	0	0	1	0	0	1	0	0	1	0	1	0	0	0	1	0	1	0	1	1	0	1	1	1	0	0
RIV2_7	Pop RIV2	0	0	0	1	0	0	0	0	0	1	1	1	0	1	0	1	0	1	0	0	0	0	0	0	1	0	0	1	0	0	0	0	0	0	0	0	1	0	1	0	1	1	0	1	1	0	0	0
RIV2_8	Pop RIV2	0	0	0	1	0	0	0	0	0	1	1	1	0	0	0	1	0	1	0	0	0	0	0	0	1	0	0	1	0	0	0	0	0	0	0	0	1	0	1	0	0	1	0	1	1	1	0	0
RIV2_9	Pop RIV2	0	0	0	1	0	0	0	0	0	1	1	1	0	0	0	1	0	1	0	0	0	0	0	0	1	0	0	1	0	0	1	0	1	1	0	0	1	0	1	0	0	1	0	1	1	1	0	0
RIV2_10	Pop RIV2	0	0	0	1	0	0	0	0	0	1	1	1	0	1	0	1	0	1	0	0	0	0	0	0	1	0	0	1	0	0	0	0	0	0	0	0	1	0	0	0	0	1	0	1	1	0	0	0
RIV2_11	Pop RIV2	0	0	0	1	0	0	0	0	0	1	1	1	0	1	0	1	0	1	0	0	0	0	0	0	1	0	0	1	0	1	1	0	0	0	0	0	1	0	1	1	0	1	0	1	1	1	1	0
RIV2_12	Pop RIV2	0	0	0	1	0	0	0	0	0	1	1	1	0	1	0	1	0	1	0	0	0	0	0	0	1	0	0	0	0	0	0	0	0	0	0	0	1	0	1	0	0	1	0	1	1	1	0	0
RIV2_13	Pop RIV2	0	0	0	1	0	0	0	0	0	1	1	1	0	0	0	1	0	1	0	0	0	0	0	0	1	0	0	1	0	0	1	0	1	1	0	0	1	0	1	0	1	1	0	1	1	0	1	0
RIV2_14	Pop RIV2	0	0	0	1	0	0	0	0	0	1	1	1	0	0	0	1	0	1	0	0	0	0	0	0	1	0	0	1	0	1	0	0	0	1	0	0	1	0	1	0	0	1	0	1	1	0	1	0
RIV2_15	Pop RIV2	0	0	0	1	0	0	0	0	0	1	1	1	0	1	0	1	0	1	0	0	0	0	0	0	1	0	0	0	0	0	1	0	1	0	0	0	1	0	1	0	0	1	0	1	1	0	1	0
[truncated: 123 more columns]
